# Supplementary material
Source: publisher figshare collection journal article supplement (https://acs.figshare.com/ndownloader/files/3742552)
Supplement: Supplementary file 1 [file 3742552]

## Supporting Information

### Synthesis and evaluation of a radioiodinated tracer with specificity for poly(ADP-ribose) polymerase-1 (PARP-1) *in vivo*.

Filip Zmuda,<sup>†,‡</sup> Gaurav Malviya,<sup>¥</sup> Adele Blair,<sup>†</sup> Marie Boyd,<sup>±</sup> Anthony J. Chalmers,<sup>‡</sup> Andrew Sutherland,<sup>†</sup> and Sally L. Pimlott\*<sup>#</sup>

<sup>†</sup>WestCHEM, School of Chemistry, The Joseph Black Building, University of Glasgow, Glasgow G12 8QQ, UK.

<sup>‡</sup>Wolfson Whol Cancer Research Centre, Institute of Cancer Sciences, University of Glasgow, Glasgow G61 1QH, UK.

<sup>¥</sup>Nuclear Imaging, Cancer Research UK Beatson Institute, Glasgow G61 1BD, UK.

<sup>±</sup>Strathclyde Institute of Pharmacy and Biomedical Sciences, John Arbuthnott Building, University of Strathclyde, Glasgow, G4 0RE, UK.

<sup>#</sup>West of Scotland PET Centre, Greater Glasgow and Clyde NHS Trust, Glasgow G12 0YN, UK.

## Table of Contents

|                                                                           |       |
|---------------------------------------------------------------------------|-------|
| 1. Synthesis of the penultimate compound <b>6</b> .                       | S2–6  |
| 2. <sup>1</sup> H- and <sup>13</sup> C-NMR for all new compounds.         | S7–22 |
| 3. Cell-free IC <sub>50</sub> curves.                                     | S23   |
| 4. Cellular IC <sub>50</sub> curves for compounds <b>1</b> and <b>5</b> . | S24   |
| 5. Plasma stability graph for compound <b>5</b> .                         | S24   |
| 6. Metabolic stability graphs for compounds <b>1</b> and <b>5</b> .       | S25   |
| 7. Radiochemistry HPLC chromatograms.                                     | S26   |
| 8. References                                                             | S27   |

## 1. Synthesis of the penultimate compound 6.

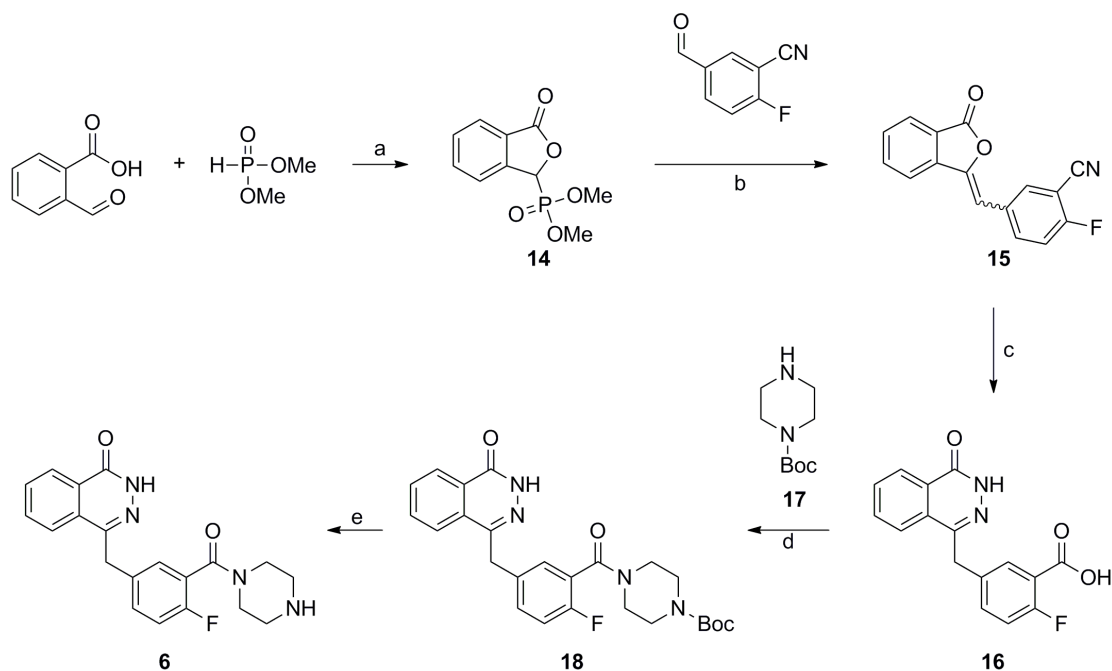

**Reagents and conditions:** (a) NaOMe, MeOH,  $\text{MeSO}_3\text{H}$ , 0 °C to rt, 2 h, 96%; (b)  $\text{Et}_3\text{N}$ , THF, 0 °C to rt, 48 h, 98%; (c) (i) 13 M NaOH, 90 °C, 24 h; then (ii)  $\text{NH}_2\text{NH}_2 \cdot \text{H}_2\text{O}$ , 70 °C, 72 h, 96% over two steps; (d) HBTU,  $\text{Et}_3\text{N}$ , DMF, rt to 50 °C, 72 h, 71%; (e) 6 M HCl, EtOH, rt, 24 h, 71%.

All reagents and starting materials were obtained from commercial sources and used as received. All dry solvents were purified using a solvent purification system. All reactions were performed under an atmosphere of argon unless otherwise mentioned. Flash column chromatography was performed using Fisher matrix silica gel 60 (35–70  $\mu\text{m}$ ). Macherey-Nagel aluminium-backed plates pre-coated with silica gel 60F<sub>254</sub> were used for thin layer chromatography and were visualized with a UV lamp or by staining with potassium permanganate.  $^1\text{H}$  NMR spectra were recorded on a Bruker DPX 400 spectrometer or a Bruker 500 spectrometer and data are reported as follows: chemical shift in ppm relative to  $\text{Me}_4\text{Si}$  or the solvent ( $\text{CDCl}_3$ ,  $\delta$  7.26 ppm,  $\text{CD}_3\text{OD}$ ,  $\delta$  3.31 ppm or  $\text{DMSO}-d_6$ ,  $\delta$  2.50 ppm) as

the internal standard, multiplicity (s = singlet, d = doublet, t = triplet, q = quartet, m = multiplet or overlap of nonequivalent resonances, integration).  $^{13}\text{C}$  NMR spectra were recorded on a Bruker DPX NMR spectrometer at either 101 or 126 MHz and data are reported as follows: chemical shift in ppm relative to  $\text{Me}_4\text{Si}$  or the solvent as internal standard ( $\text{CDCl}_3$ ,  $\delta$  77.2 ppm,  $\text{CD}_3\text{OD}$ ,  $\delta$  49.0 ppm or  $\text{DMSO}-d_6$ ,  $\delta$  39.5 ppm), multiplicity with respect to proton (deduced from DEPT experiments, C, CH,  $\text{CH}_2$  or  $\text{CH}_3$ ). Infrared spectra were recorded using a Shimadzu IRPrestige-21 spectrometer; wavenumbers are indicated in  $\text{cm}^{-1}$ . Mass spectra were recorded using electron impact, chemical ionization or electrospray techniques. HRMS spectra were recorded using a JEOL JMS-700 spectrometer. Melting points are uncorrected.

**4-[4'-Fluoro-3'-(piperazine-1''-carbonyl)benzyl]-2H-phthalazin-1-one (6).**<sup>1</sup> To a suspension of **18** (1.40 g, 3.00 mmol) in EtOH (30 mL) was added 6 M HCl (60 mL) and the mixture was stirred overnight at room temperature. EtOH was removed under reduced pressure and the aqueous layer was basified to approximately pH 10 using 4 M NaOH. The product was extracted into  $\text{CH}_2\text{Cl}_2$  ( $3 \times 30$  mL) and the organic layer was washed with water ( $3 \times 50$  mL), dried with  $\text{MgSO}_4$  and concentrated *in vacuo*. Purification by recrystallization with  $\text{CH}_2\text{Cl}_2$  (5 mL) and petroleum ether (25 mL) gave **6** (0.776 g, 71%) as a yellow foam;  $^1\text{H}$  NMR (400 MHz,  $\text{CDCl}_3$ )  $\delta$  2.25–3.15 (m, 4H), 3.16–3.96 (m, 4H), 4.25 (s, 2H), 5.99 (br s, 1H), 6.97 (t,  $J$  8.8 Hz, 1H), 7.24–7.35 (m, 2H), 7.64–7.76 (m, 3H), 8.38–8.46 (m, 1H), 12.01 (br s, 1H);  $^{13}\text{C}$  NMR (101 MHz,  $\text{CDCl}_3$ )  $\delta$  37.9 ( $\text{CH}_2$ ), 43.3 ( $\text{CH}_2$ ), 45.9 ( $\text{CH}_2$ ), 46.4 ( $\text{CH}_2$ ), 48.4 ( $\text{CH}_2$ ), 116.1 (CH, d,  $J_{\text{C-C-F}}$  22.1 Hz), 124.4 (C, d,  $J_{\text{C-C-F}}$  18.4 Hz), 125.2 (CH), 127.3 (CH), 128.4 (C), 129.2 (CH, d,  $J_{\text{C-C-C-F}}$  3.8 Hz), 129.7 (C), 131.3 (CH, d,  $J_{\text{C-C-C-F}}$  8.0 Hz), 131.7 (CH), 133.8 (CH), 134.3 (C, d,  $J_{\text{C-C-C-F}}$  3.0 Hz), 145.7 (C), 157.2 (C, d,  $J_{\text{C-F}}$  247.7 Hz), 160.8 (C), 165.0 (C); HRMS (ESI) calcd for  $\text{C}_{20}\text{H}_{20}\text{FN}_4\text{O}_2$  ( $\text{MH}^+$ ), 367.1565, found 367.1553.

**3-Dimethoxyphosphoryl-3*H*-2-benzofuran-1-one (14).**<sup>1</sup> Dimethylphosphite (0.92 mL, 10.0 mmol) was added dropwise to a solution of NaOMe (0.583 g, 10.8 mmol) in MeOH (15 mL) at 0 °C. To the solution, 2-carboxybenzaldehyde (1.00 g, 6.66 mmol) was added portionwise while stirring. The mixture was gradually warmed to room temperature and stirred for 2 h. Methanesulfonic acid (0.77 mL, 11.9 mmol) was added dropwise and the mixture was allowed to stir for a further 0.5 h. The solution was concentrated *in vacuo* to produce a white solid, to which water was added (30 mL) and the crude product was extracted into CH<sub>2</sub>Cl<sub>2</sub> (3 × 30 mL). The organic layer was washed with water (2 × 30 mL), dried with MgSO<sub>4</sub> and filtered. The filtrate was concentrated *in vacuo* and washed with Et<sub>2</sub>O (3 × 20 mL) to give **14** (1.54 g, 96%) as a white solid. Mp 90–91 °C; <sup>1</sup>H NMR (400 MHz, CD<sub>3</sub>OD) δ 3.72 (d, *J* 10.8 Hz, 3H), 3.91 (d, *J* 10.8 Hz, 3H), 6.10 (d, *J* 10.8 Hz, 1H), 7.68 (t, *J* 7.5 Hz, 1H), 7.75 (d, *J* 7.5 Hz, 1H), 7.83 (t, *J* 7.5 Hz, 1H), 7.94 (d, *J* 7.5 Hz, 1H); <sup>13</sup>C NMR (101 MHz, CD<sub>3</sub>OD) δ 54.9 (CH<sub>3</sub>, d, *J*<sub>C-O-P</sub> 6.8 Hz), 55.3 (CH<sub>3</sub>, d, *J*<sub>C-O-P</sub> 7.4 Hz), 76.4 (CH, d, *J*<sub>C-P</sub> 167.0 Hz), 124.7 (CH, d, *J*<sub>C-C-C-P</sub> 3.0 Hz), 126.2 (C, d, *J*<sub>C-C-P</sub> 4.1 Hz), 126.8 (CH, d, *J*<sub>C-C-C-C-P</sub> 1.9 Hz), 131.2 (CH, d, *J*<sub>C-C-C-C-P</sub> 2.9 Hz), 135.9 (CH, d, *J*<sub>C-C-C-C-P</sub> 2.8 Hz), 145.2 (C, d, *J*<sub>C-C-C-P</sub> 4.0 Hz), 171.3 (C, d, *J*<sub>C-O-C-P</sub> 2.7 Hz); MS (EI) *m/z* 242 (M<sup>+</sup>, 37), 213 (10), 199 (9), 133 (100), 105 (13), 77 (17), 51 (5).

**2-Fluoro-5-[(3'-oxo-2'-benzofuran-1'-ylidene)methyl]benzonitrile (15).**<sup>1</sup> A solution of **14** (3.87 g, 16.0 mmol) and 2-fluoro-5-formylbenzonitrile (2.26 g, 15.2 mmol) in THF (50 mL) was prepared at room temperature. The solution was then cooled to 0 °C followed by the addition of Et<sub>3</sub>N (2.15 mL, 16.0 mmol). The reaction mixture was allowed to warm up to room temperature and was stirred for 48 h, followed by concentration *in vacuo* to produce a white solid. The solid was suspended in water, collected by vacuum filtration and washed with hexane (2 × 20 mL), Et<sub>2</sub>O (2 × 20 mL), and MeOH (2 × 20 mL) to give **15** (3.77 g, 98%) as a white solid. NMR spectra showed a 3:1 mixture of *E* and *Z* isomers. Only data for the major isomer were recorded. Mp 164–167 °C; <sup>1</sup>H NMR (400 MHz, DMSO-*d*<sub>6</sub>) δ 6.98 (s, 1H), 7.65 (t, *J* 9.0 Hz, 1H), 7.67–7.75 (m, 1H), 7.92 (td, *J* 7.6, 1.0 Hz, 1H), 7.97–8.00 (m, 1H), 8.08 (dt, *J* 8.0, 1.0 Hz, 1H), 8.12–8.21 (m, 1H); <sup>13</sup>C NMR (101 MHz, DMSO-*d*<sub>6</sub>) δ 100.8 (C, d, *J*<sub>C-</sub>

$_{\text{C-F}}$  15.8 Hz), 103.4 (CH), 113.8 (C), 117.4 (CH, d,  $J_{\text{C-C-F}}$  20.0 Hz), 121.0 (CH), 122.6 (C), 125.4 (CH), 130.9 (CH), 131.0 (C, d,  $J_{\text{C-C-C-C-F}}$  3.7 Hz), 134.2 (CH), 135.4 (CH), 136.7 (CH, d,  $J_{\text{C-C-C-F}}$  9.0 Hz), 139.5 (C), 145.4 (C), 161.5 (C, d,  $J_{\text{C-F}}$  258.1 Hz), 165.9 (C); MS (EI)  $m/z$  265 ( $\text{M}^+$ , 100), 237 (12), 208 (64), 182 (10), 133 (13), 104 (14), 63 (29), 45 (8).

**2-Fluoro-5-[(4'-oxo-3'-H-phthalazin-1'-yl)methyl]benzoic acid (16).**<sup>1</sup> 2-Fluoro-5-[(3'-oxo-2'-benzofuran-1'-ylidene)methyl]benzonitrile (**15**) (1.77 g, 7.00 mmol) was suspended in water (30 mL) and 13 M NaOH was added (30 mL). The mixture was heated to 90 °C and stirred for 24 h, after which it was cooled to 70 °C, followed by the addition of hydrazine monohydrate (4.76 mL, 98.0 mmol) and a further 72 h of stirring. The mixture was then cooled to room temperature and acidified with 8 M HCl to an approximate pH of 4. The solid precipitate was collected by vacuum filtration and washed with water (3  $\times$  25 mL) and Et<sub>2</sub>O (4  $\times$  25 mL) to give **16** (2.00 g, 96%) as a red solid. Mp >300 °C; <sup>1</sup>H NMR (400 MHz, DMSO-*d*<sub>6</sub>)  $\delta$  4.36 (s, 2H), 7.24 (dd,  $J$  10.8, 8.5 Hz, 1H), 7.54–7.62 (m, 1H), 7.79–7.87 (m, 2H), 7.90 (td,  $J$  7.5, 1.3 Hz, 1H), 7.98 (d,  $J$  7.5 Hz, 1H), 8.26 (dd,  $J$  7.8, 1.3 Hz, 1H), 12.60 (s, 1H), 13.24 (br s, 1H); <sup>13</sup>C NMR (101 MHz, DMSO-*d*<sub>6</sub>)  $\delta$  36.3 (CH<sub>2</sub>), 117.0 (CH, d,  $J_{\text{C-C-F}}$  22.8 Hz), 119.1 (C, d,  $J_{\text{C-C-F}}$  10.7 Hz), 125.5 (CH), 126.1 (CH), 127.9 (C), 129.1 (C), 131.6 (CH), 131.9 (CH), 133.6 (CH), 134.3 (C, d,  $J_{\text{C-C-C-C-F}}$  3.4 Hz), 134.9 (CH, d,  $J_{\text{C-C-C-F}}$  8.7 Hz), 144.9 (C), 159.4 (C), 160.3 (C, d,  $J_{\text{C-F}}$  255.5 Hz), 165.0 (C, d,  $J_{\text{C-C-C-F}}$  2.8 Hz); HRMS (ESI) calcd for C<sub>16</sub>H<sub>10</sub>FN<sub>2</sub>O<sub>3</sub> ( $\text{M-H}^-$ ), 297.0681, found 297.0671.

**tert-Butyl piperazine-1-carboxylate (17).** Di-*tert*-butyl dicarbonate (4.04 g, 18.5 mmol) was dissolved in glacial AcOH (20 mL) and this was added dropwise to a solution of piperazine (1.60 g, 18.5 mmol) in 50% AcOH (40 mL) at room temperature. The mixture was stirred for 2 h, followed by addition of water (50 mL) and removal of the precipitate by filtration. The filtrate was basified to approximately pH 10 using 6 M KOH and the product was extracted into CH<sub>2</sub>Cl<sub>2</sub> (3  $\times$  25 mL). The organic layer was dried with Na<sub>2</sub>SO<sub>4</sub> and concentrated *in vacuo* to give **17** (1.58 g, 46%) as a white solid. Mp 46–48 °C (lit.<sup>2</sup> 46–47 °C); <sup>1</sup>H NMR (400 MHz, CD<sub>3</sub>OD)  $\delta$  1.46 (s, 9H), 2.75 (t,  $J$  5.0 Hz, 4H), 3.38 (t,  $J$  5.0 Hz,

4H);  $^{13}\text{C}$  NMR (101 MHz,  $\text{CD}_3\text{OD}$ )  $\delta$  28.7 ( $3 \times \text{CH}_3$ ), 44.8 ( $2 \times \text{CH}_2$ ), 46.3 ( $2 \times \text{CH}_2$ ), 81.1 (C), 156.4 (C); MS (CI)  $m/z$  187 ( $\text{MH}^+$ , 78), 175 (5), 131 (100), 87 (20), 73 (10).

**tert-Butyl 4-[2'-fluoro-5'-[(4''-oxo-3''*H*-phthalazin-1''-yl)methyl]benzoyl]piperazine-1-carboxylate (18).**<sup>1</sup> To a solution of **16** (2.75 g, 9.23 mmol) in DMF (70 mL) was added  $\text{Et}_3\text{N}$  (2.00 mL, 14.8 mmol), followed by HBTU (3.85 g, 10.2 mmol). The mixture was stirred at room temperature for 1 h, after which it was warmed to 50 °C and **17** (1.72 g, 9.23 mmol) was added with continued stirring for 72 h. Water (70 mL) was then added and the mixture was stirred at 50 °C for a further 2 h, followed by cooling to 0 °C. The resulting precipitate was collected by vacuum filtration and washed with water ( $5 \times 25$  mL),  $\text{Et}_2\text{O}$  ( $2 \times 25$  mL), and *i*-PrOH (50 mL) to give **18** (3.04 g, 71%) as an orange solid. Mp 214–216 °C;  $^1\text{H}$  NMR (400 MHz,  $\text{CDCl}_3$ )  $\delta$  1.46 (s, 9H), 3.27 (br s, 2H), 3.38 (t,  $J$  5.1 Hz, 2H), 3.51 (br s, 2H), 3.75 (br s, 2H), 4.28 (s, 2H), 7.03 (t,  $J$  8.8 Hz, 1H), 7.27–7.36 (m, 2H), 7.68–7.73 (m, 1H), 7.74–7.80 (m, 2H), 8.44–8.50 (m, 1H), 10.52 (s, 1H);  $^{13}\text{C}$  NMR (101 MHz,  $\text{CDCl}_3$ )  $\delta$  28.5 ( $3 \times \text{CH}_3$ ), 37.9 ( $\text{CH}_2$ ), 42.1 ( $2 \times \text{CH}_2$ ), 47.0 ( $2 \times \text{CH}_2$ ), 80.5 (C), 116.3 (CH, d,  $J_{\text{C-C-F}}$  22.2 Hz), 124.1 (C, d,  $J_{\text{C-C-F}}$  17.9 Hz), 125.2 (CH), 127.3 (CH), 128.5 (C), 129.3 (CH, d,  $J_{\text{C-C-C-F}}$  3.7 Hz), 129.7 (C), 131.7 (CH, d,  $J_{\text{C-C-C-F}}$  8.1 Hz), 131.8 (CH), 133.8 (CH), 134.5 (C, d,  $J_{\text{C-C-C-C-F}}$  3.0 Hz), 145.7 (C), 154.6 (C), 157.1 (C, d,  $J_{\text{C-F}}$  246.1 Hz), 160.6 (C), 165.2 (C); MS (EI)  $m/z$  466 ( $\text{M}^+$ , 17), 365 (40), 311 (30), 281 (100), 254 (30), 196 (12), 178 (42), 165 (10), 85 (16), 57 (57).

2.  $^1\text{H}$ - and  $^{13}\text{C}$ -NMR for all new compounds.

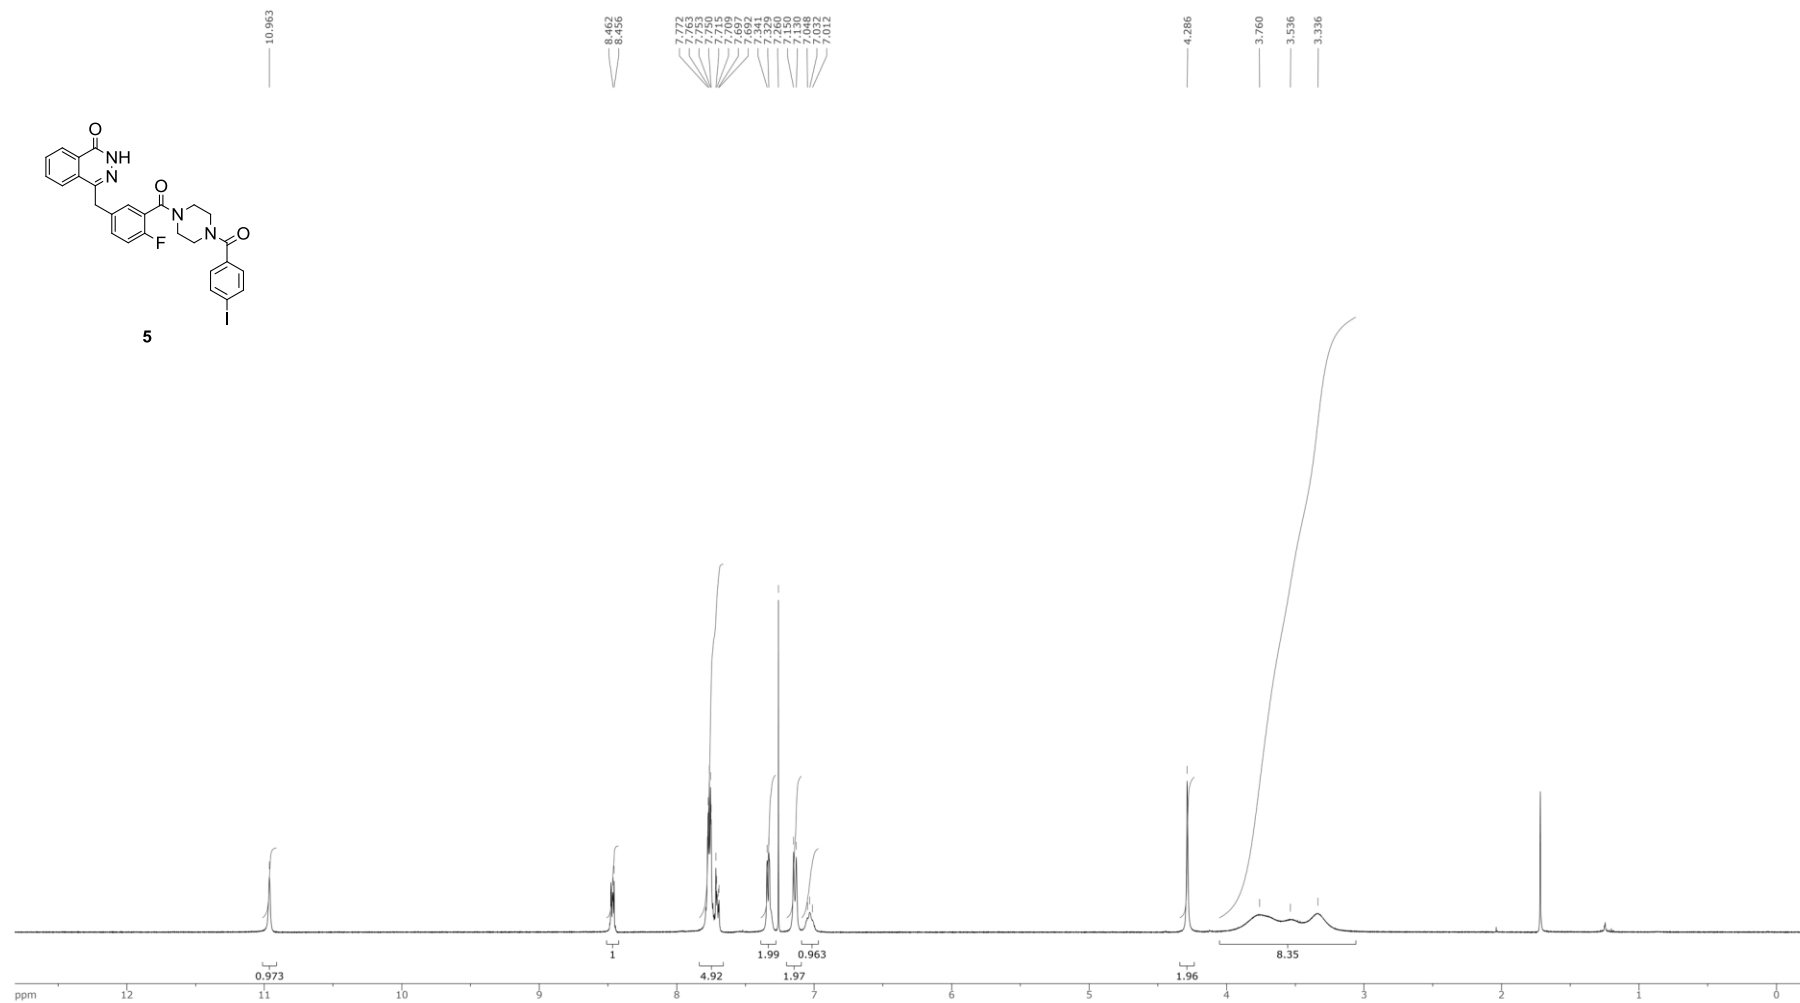

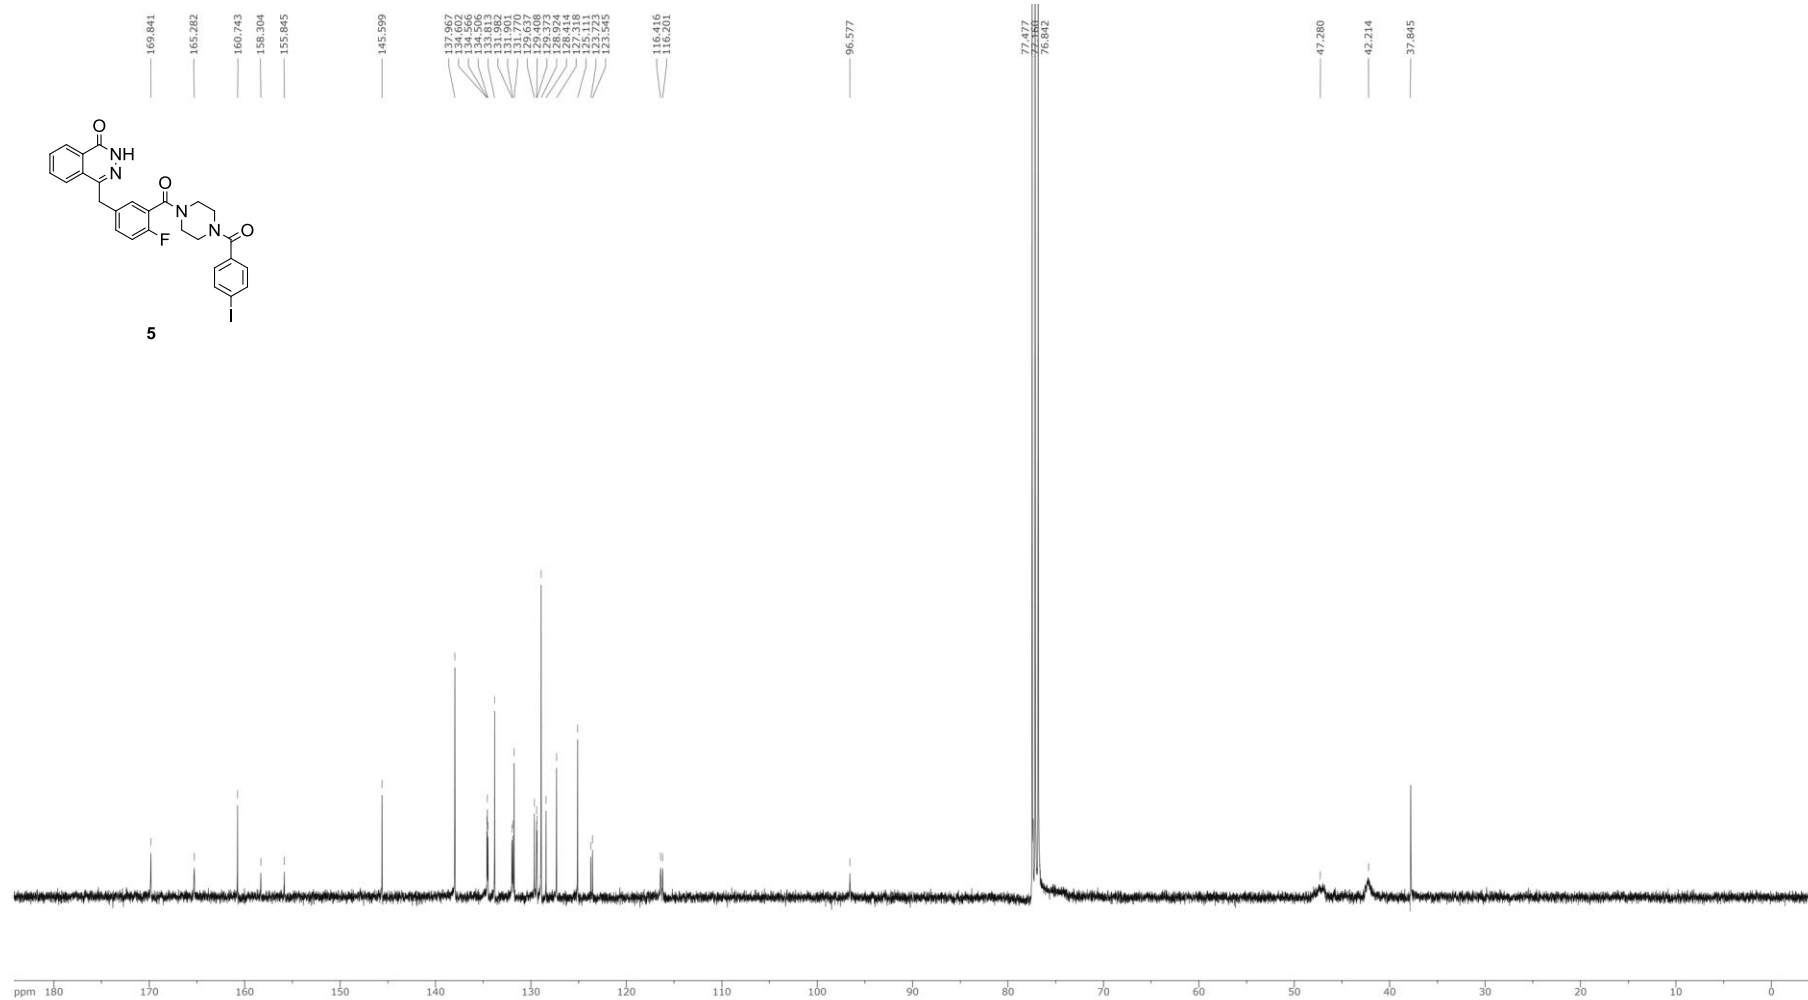



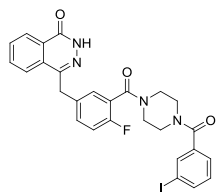

7

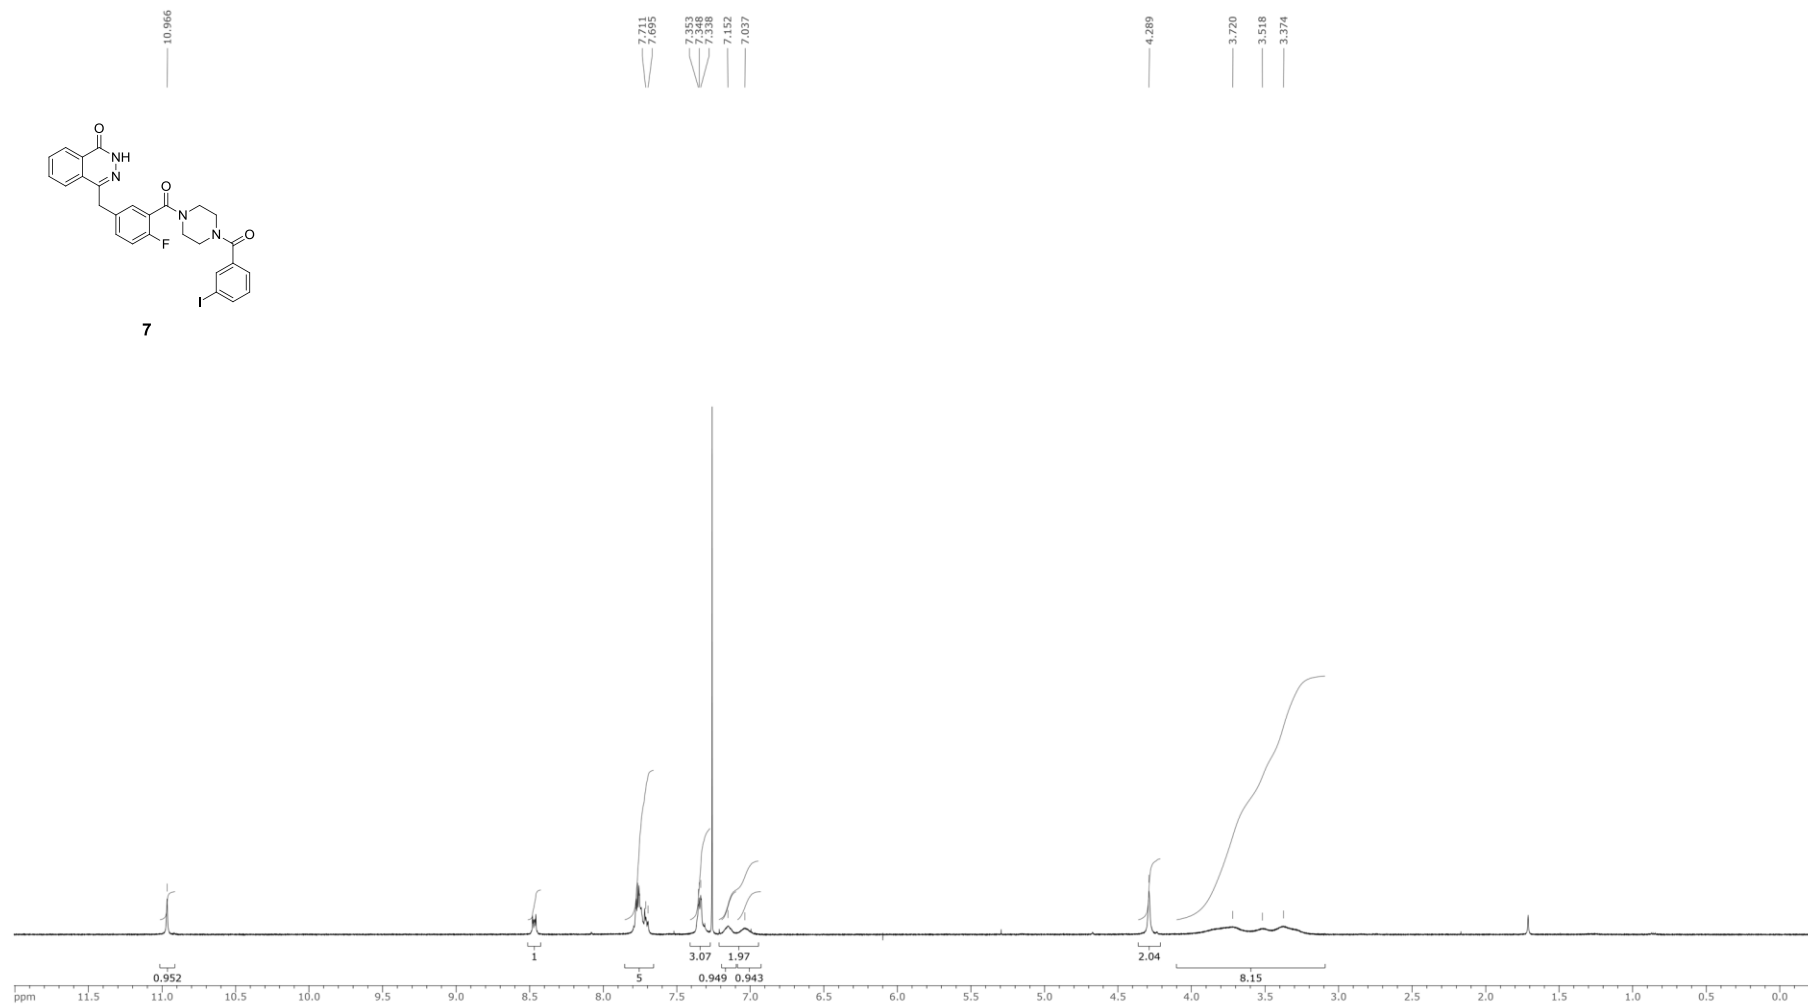

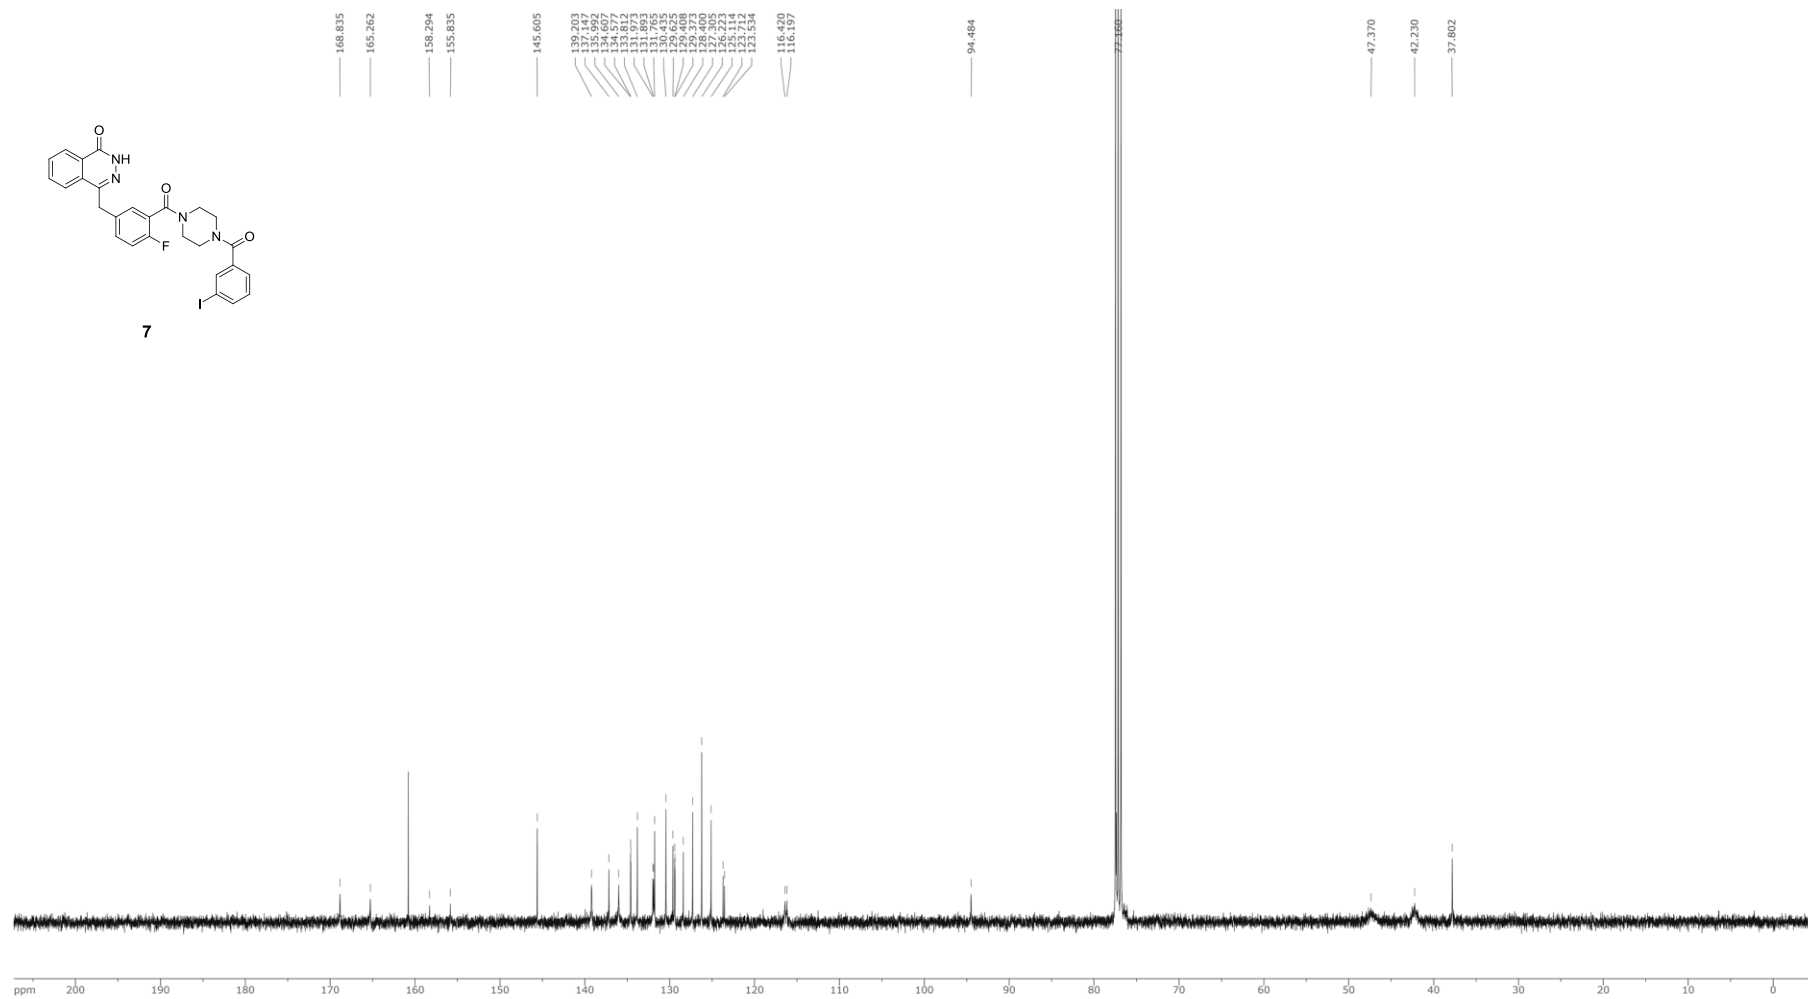

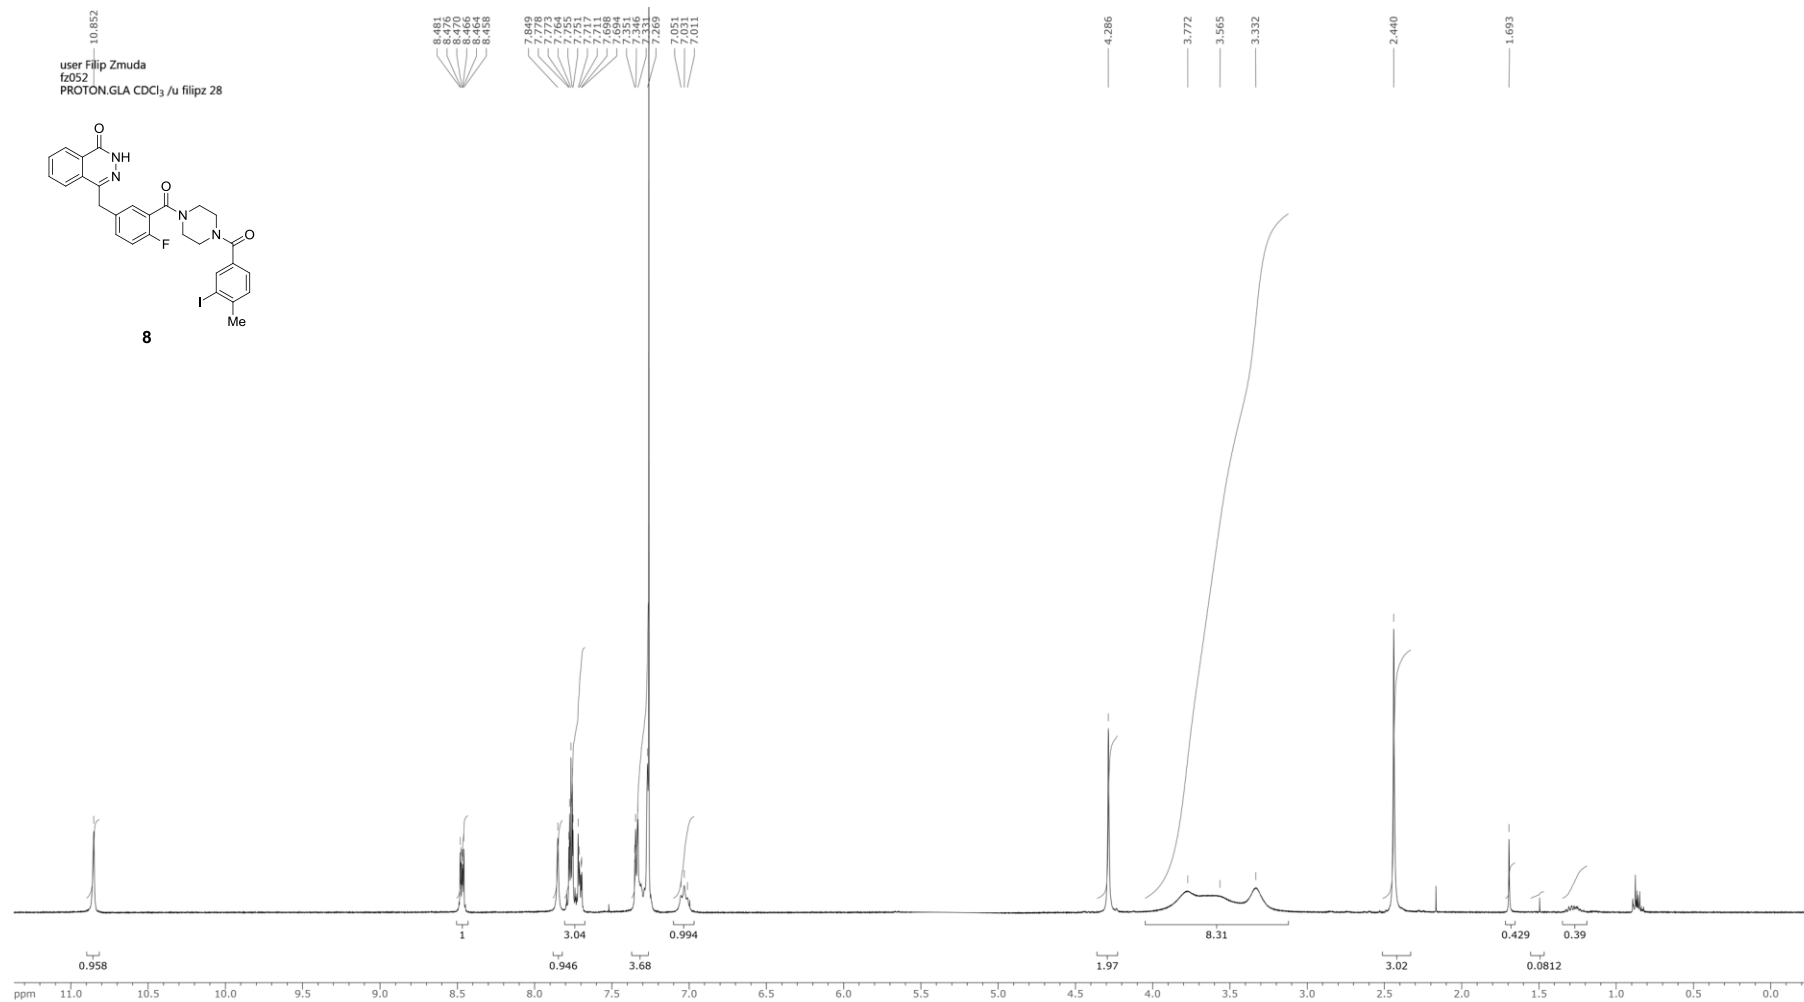

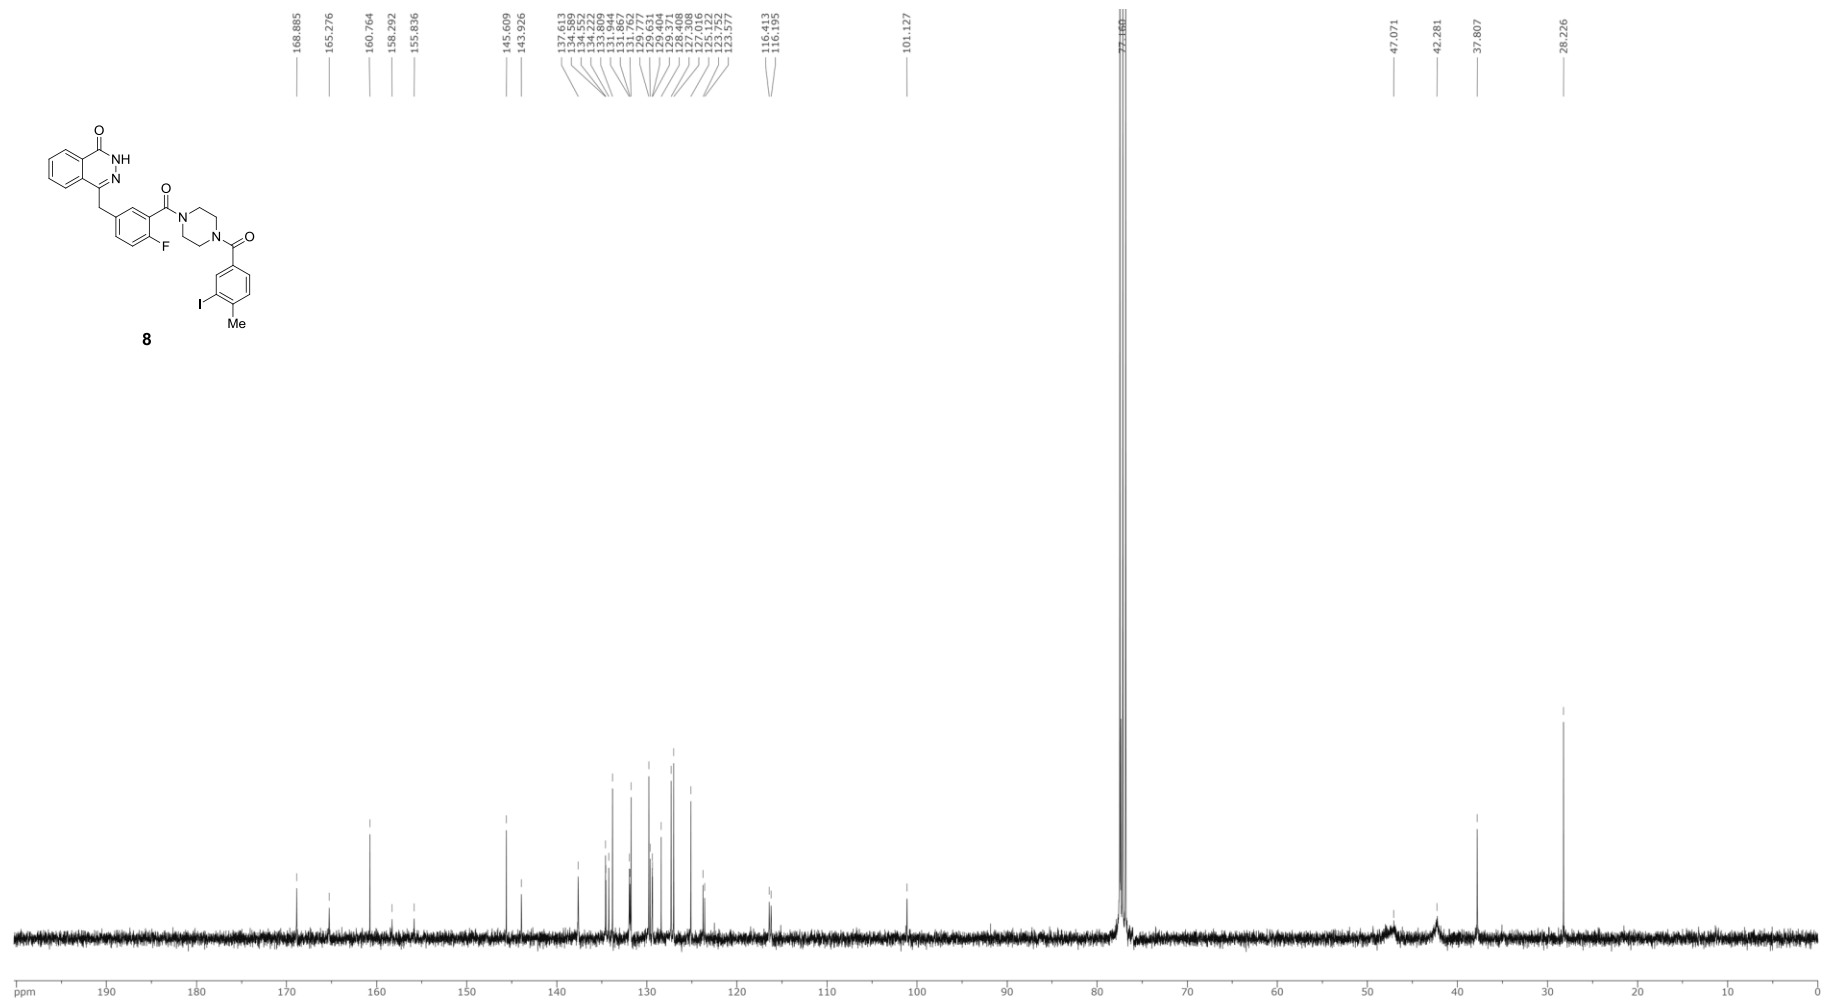

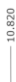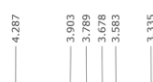

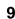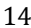

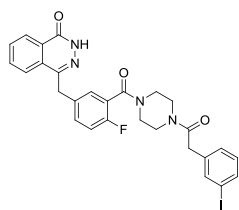

10

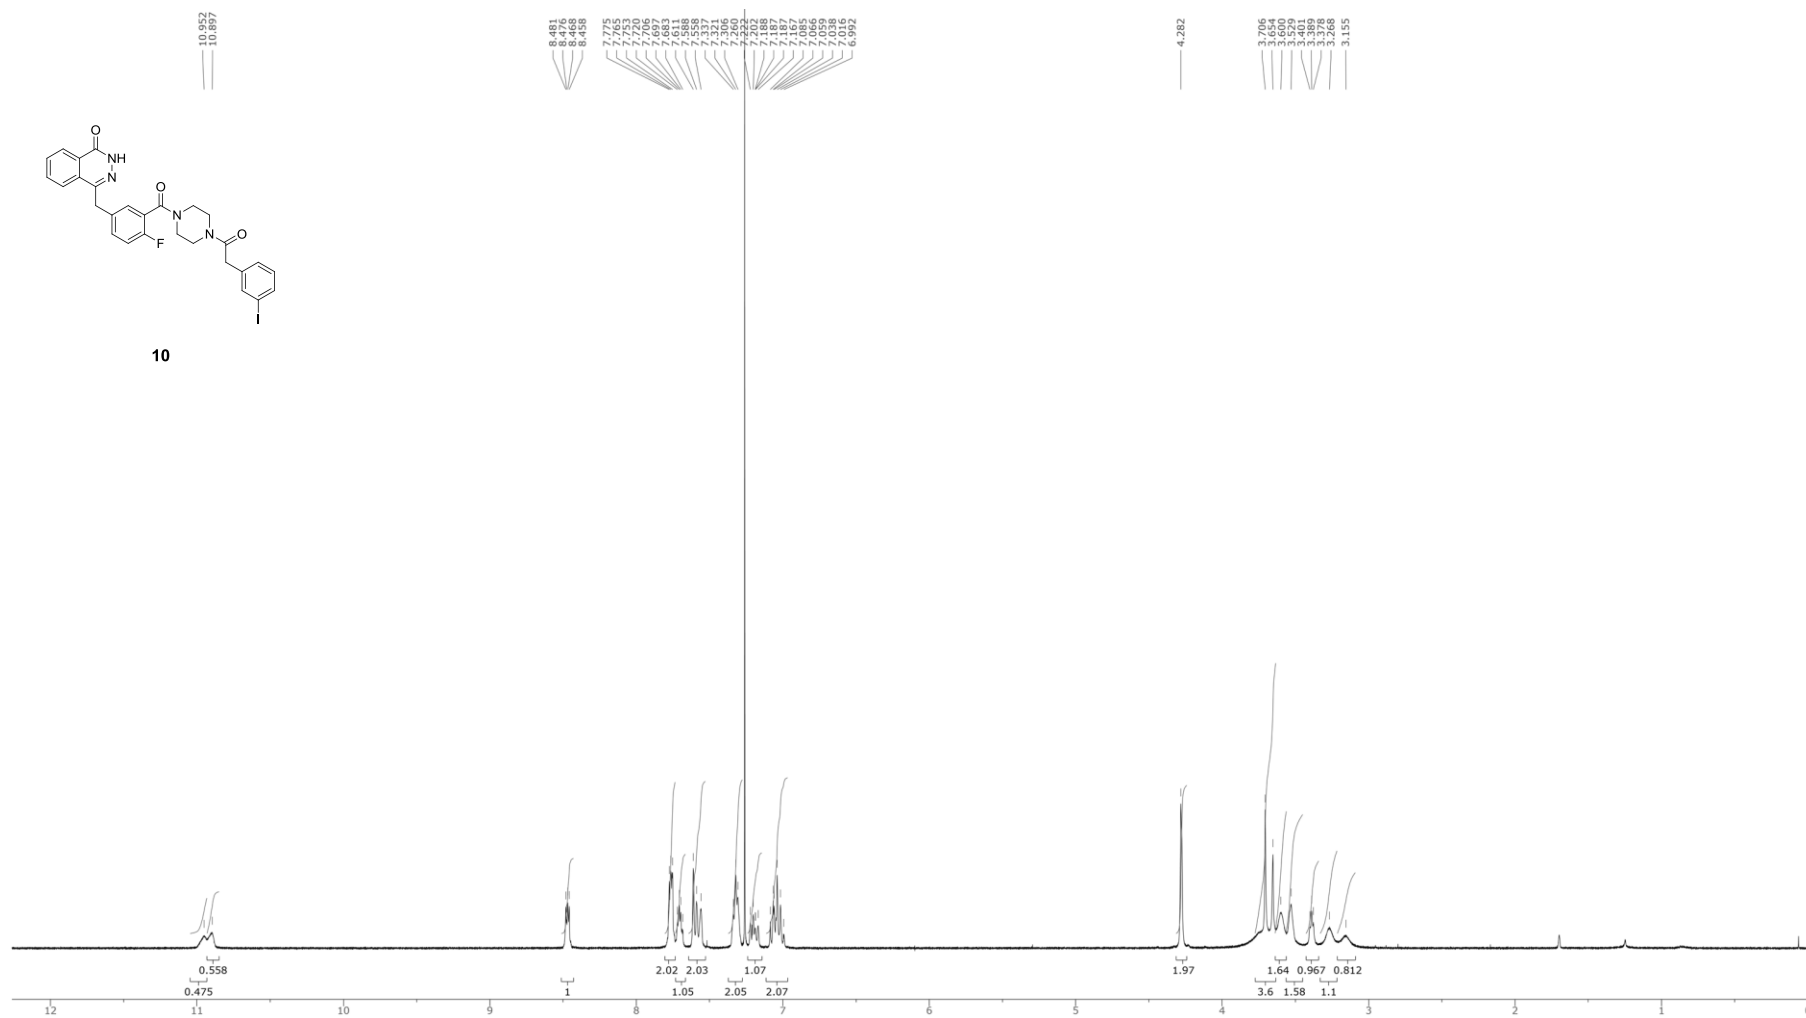

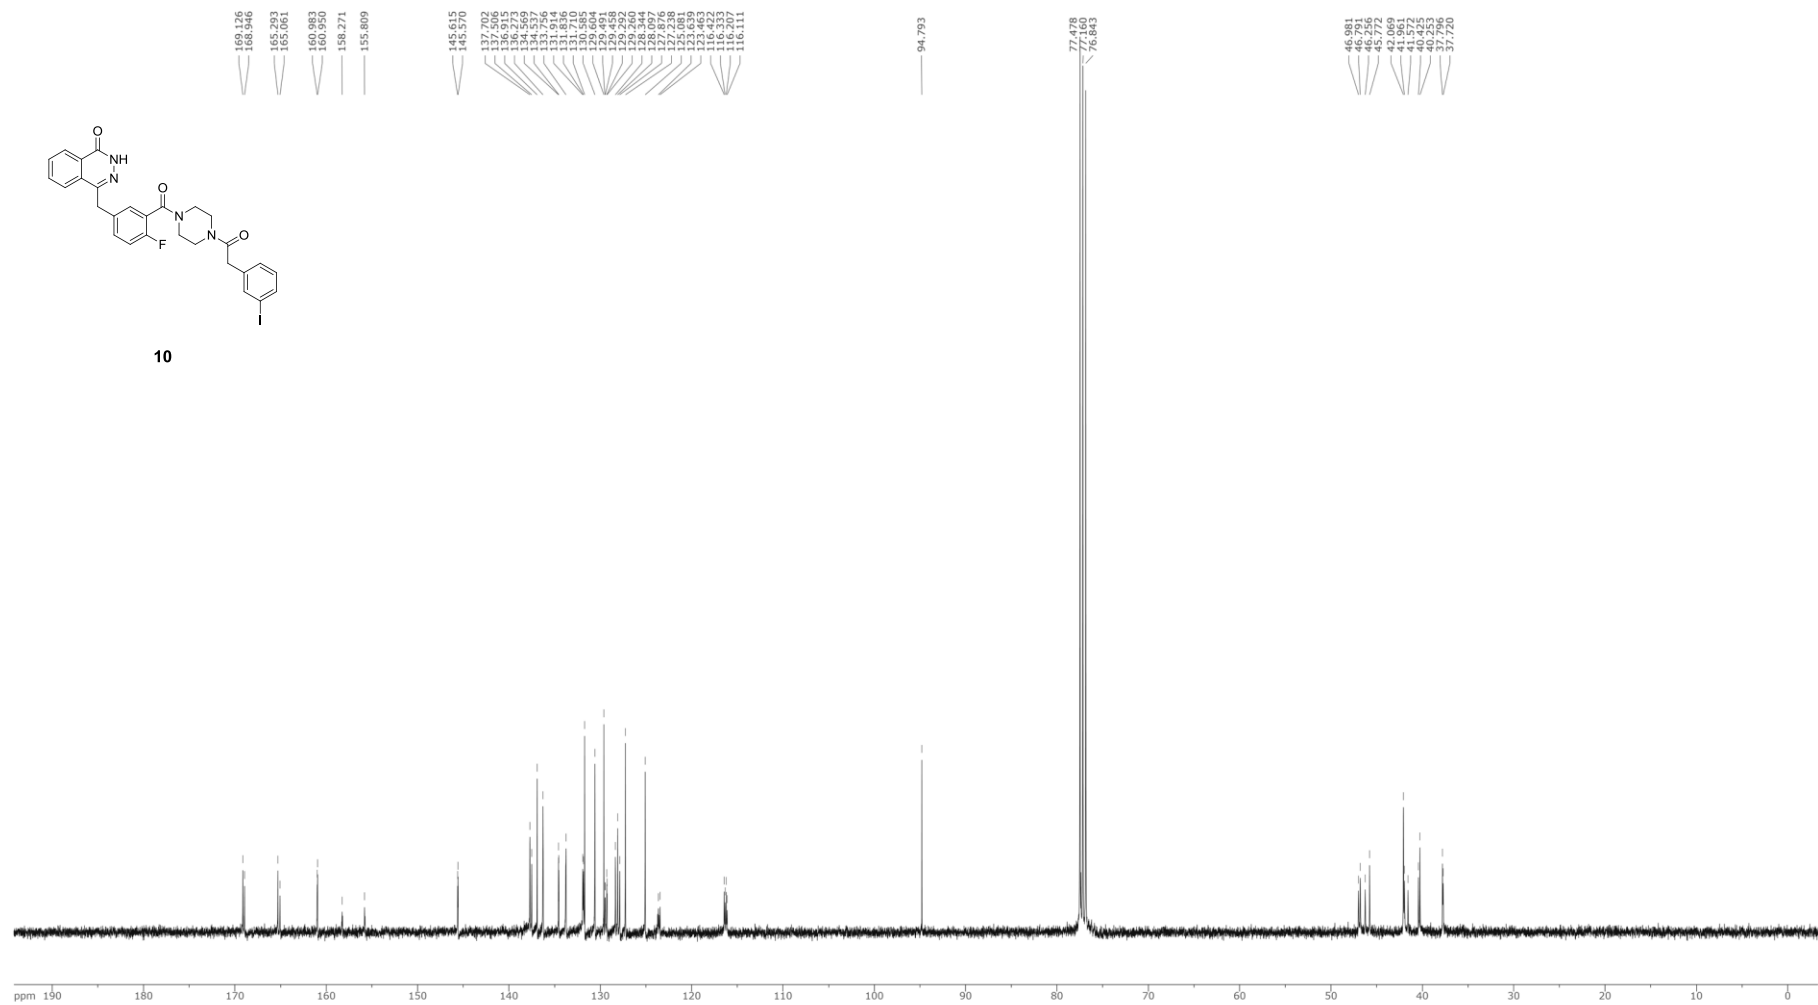



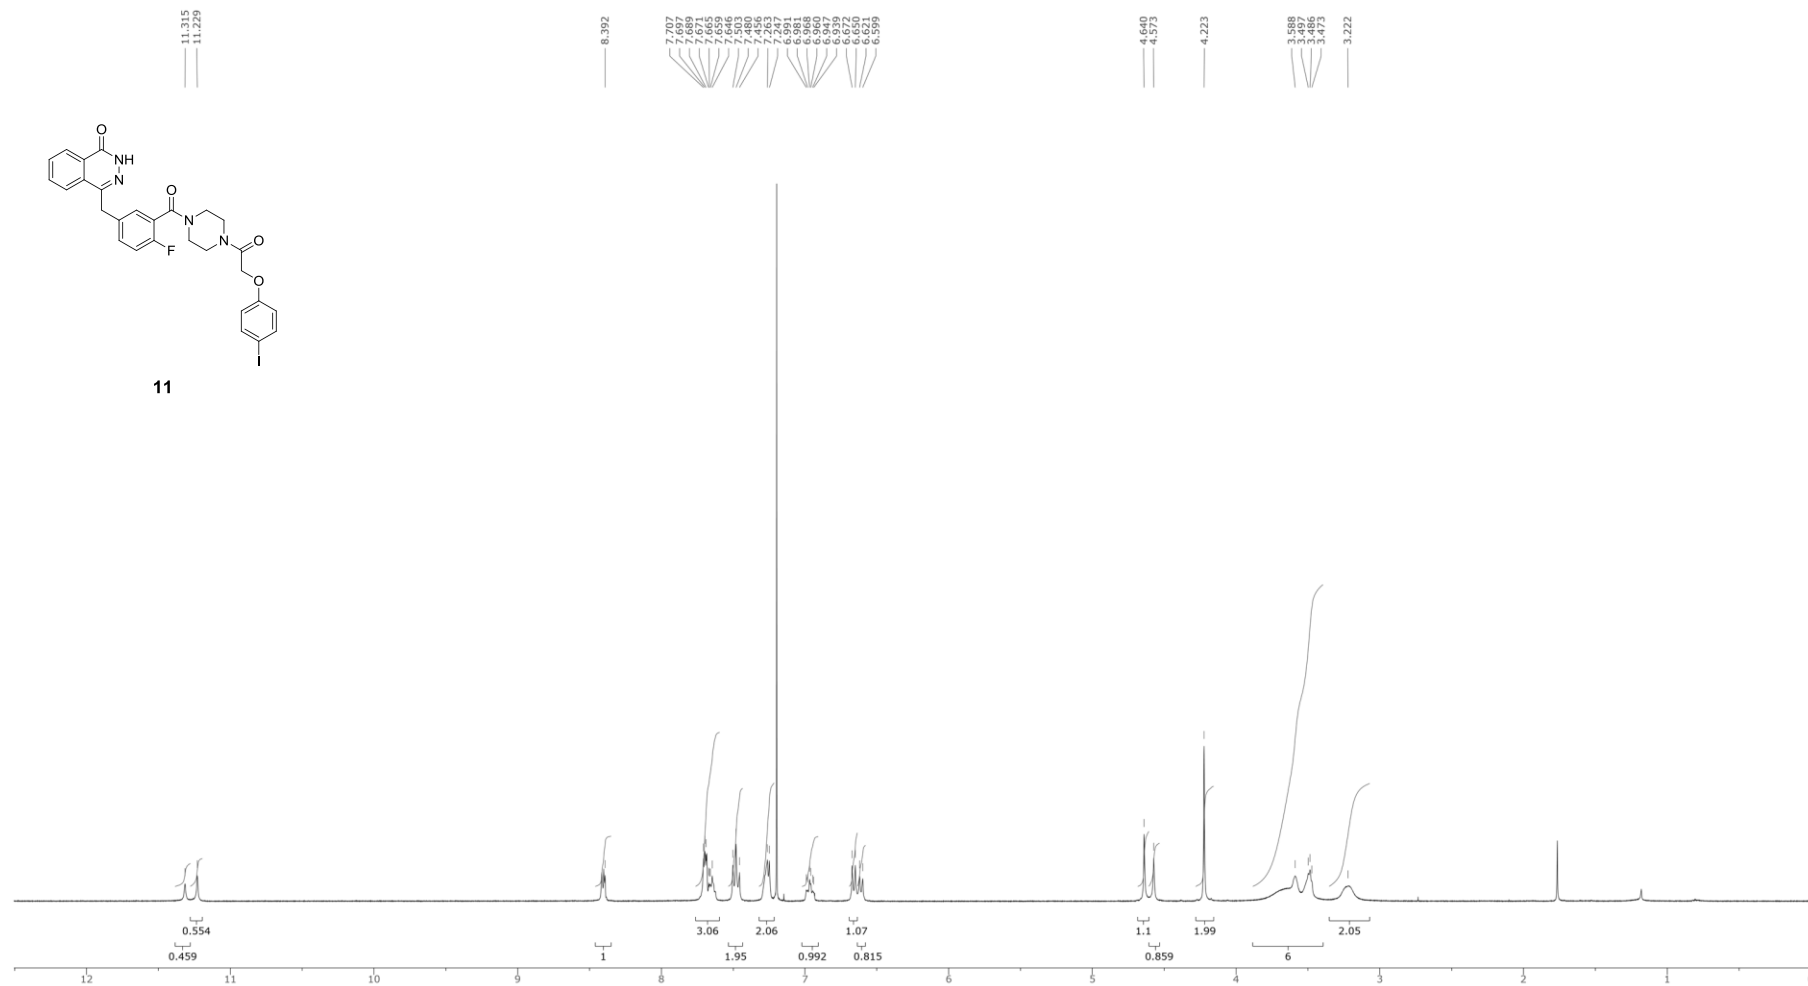

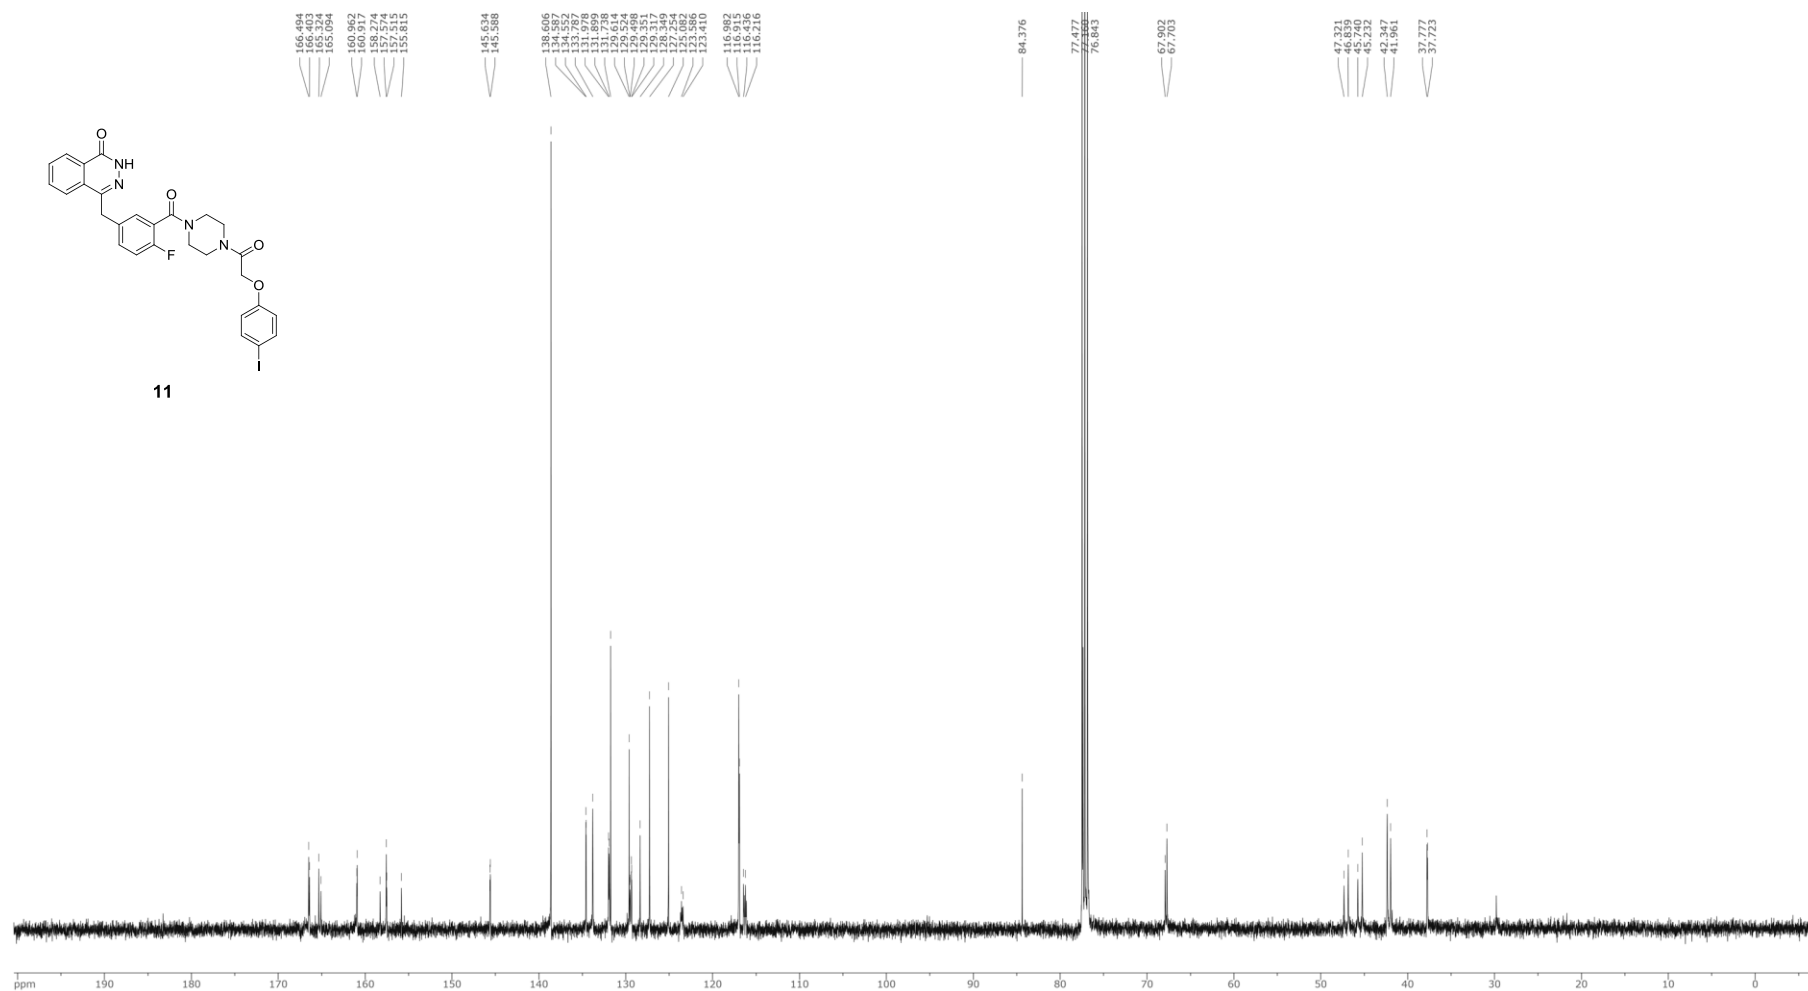

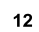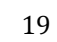

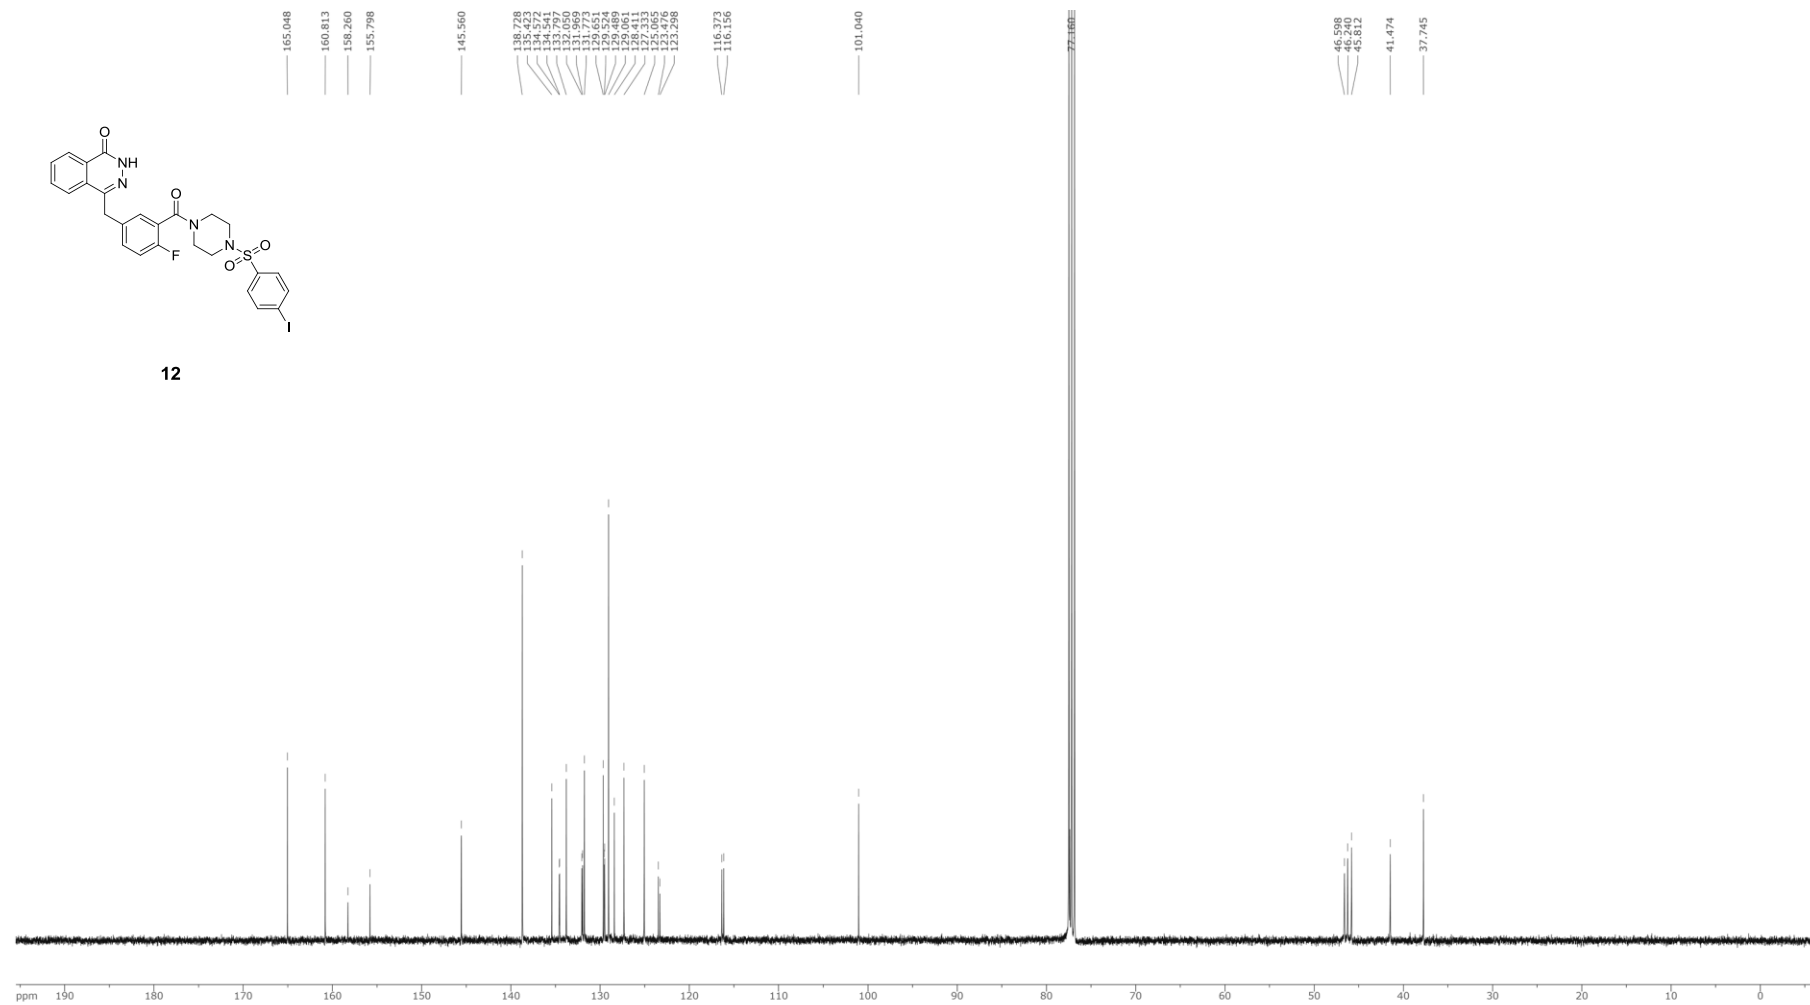

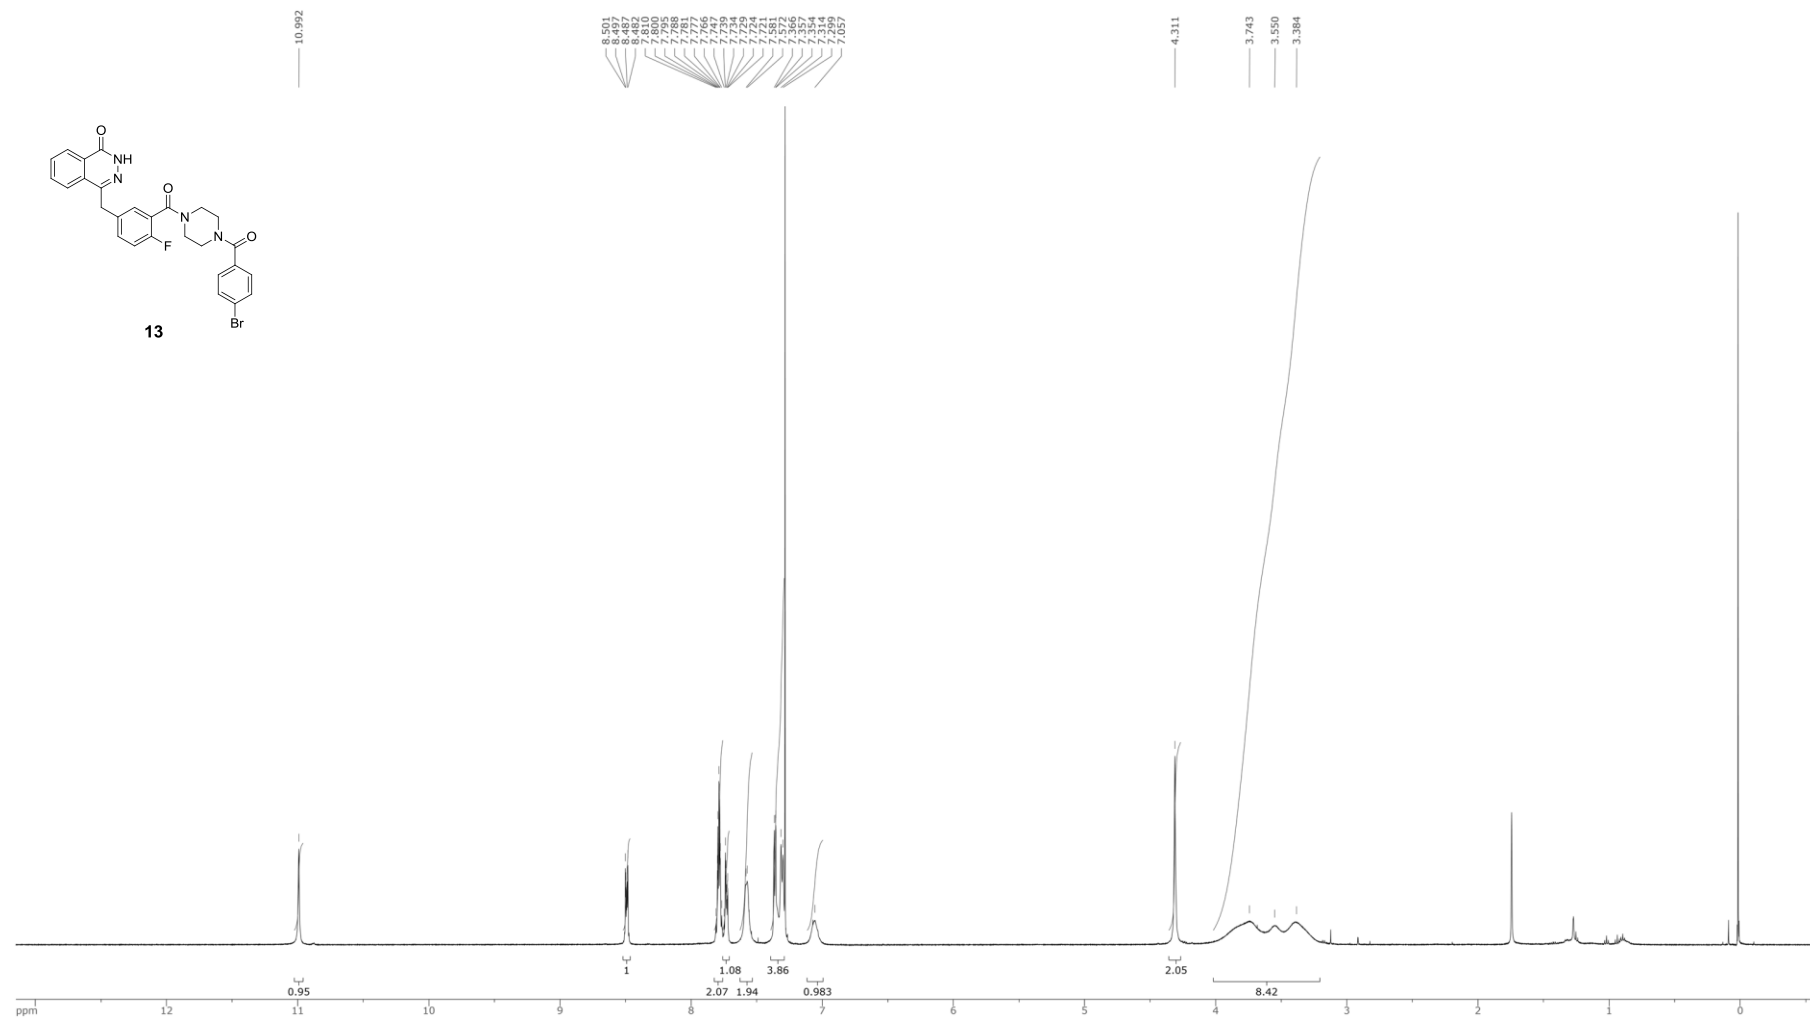

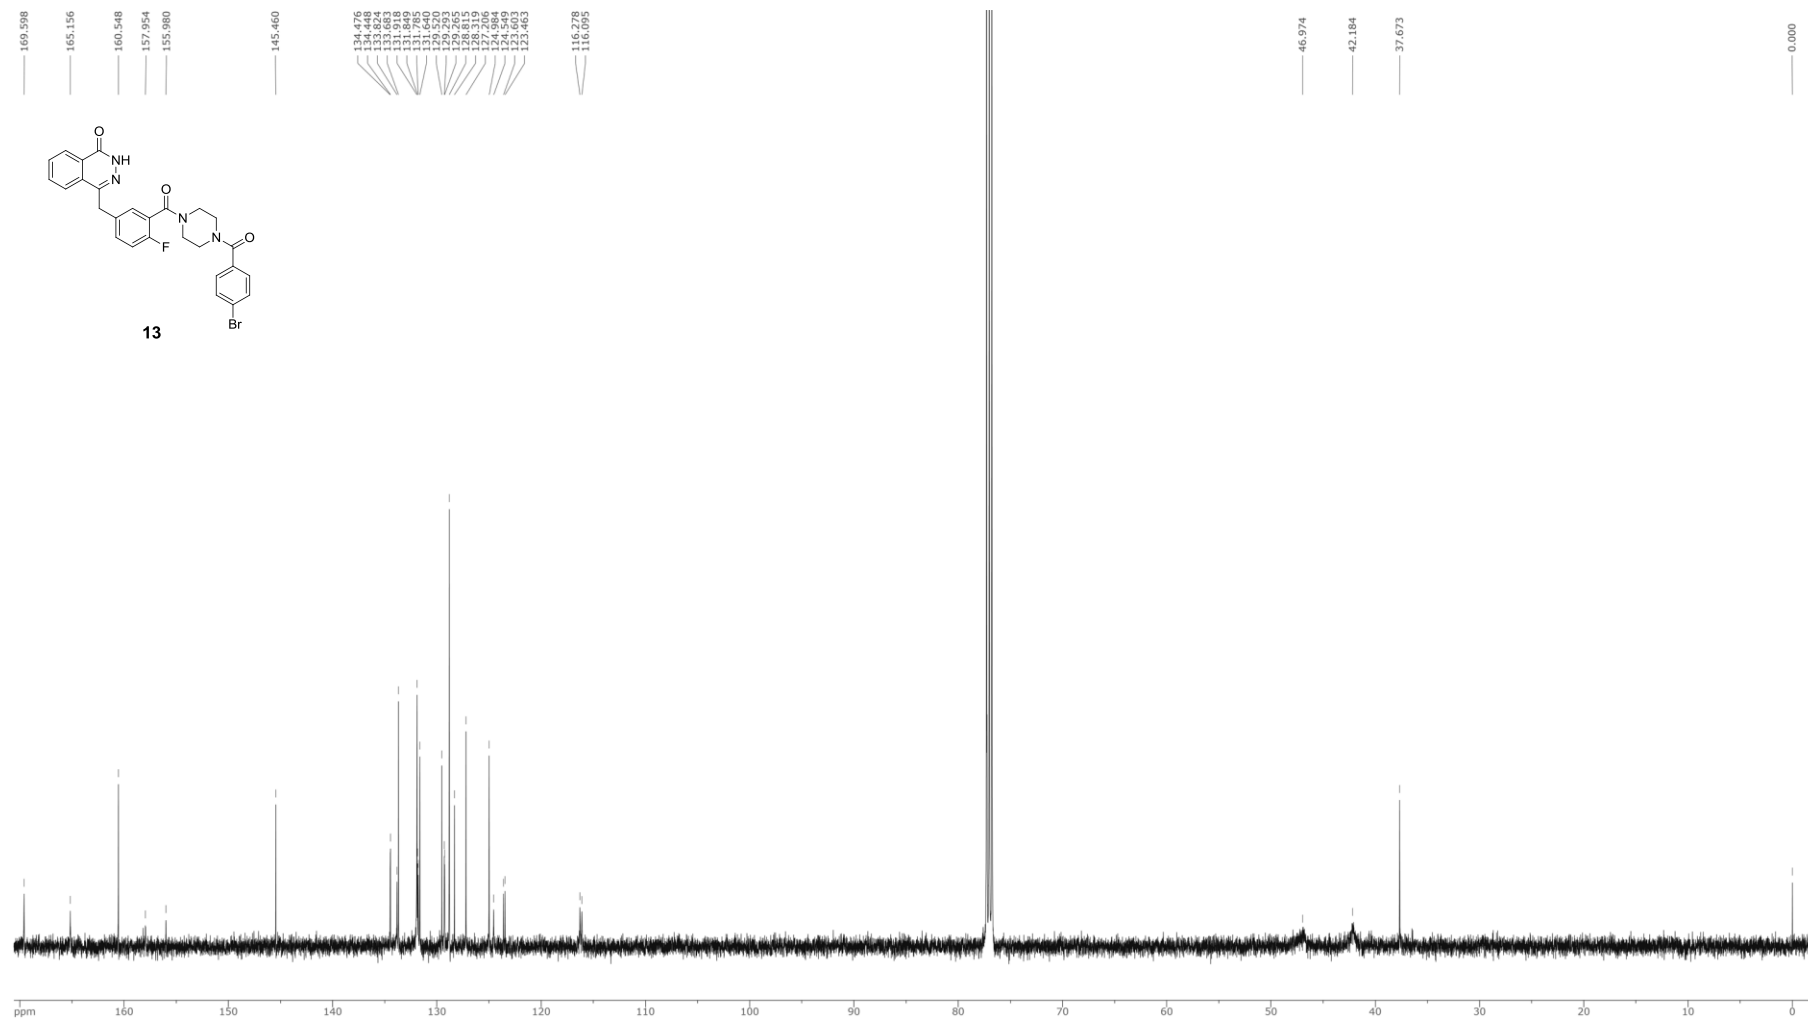

### 3. Cell-free IC<sub>50</sub> curves.

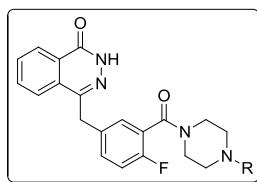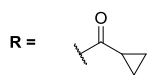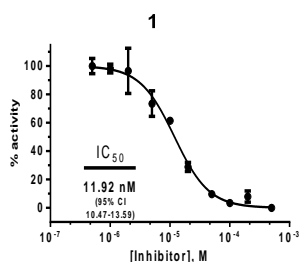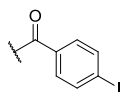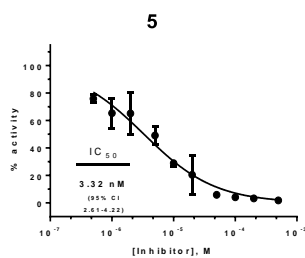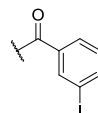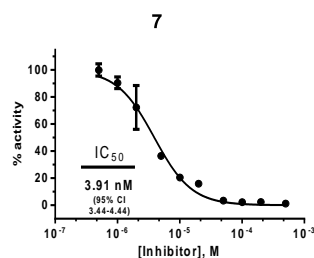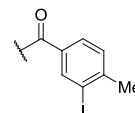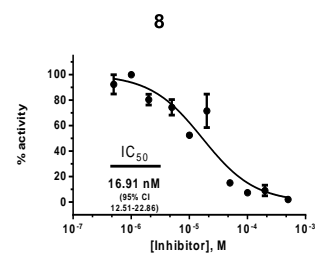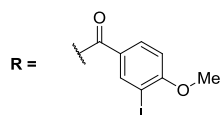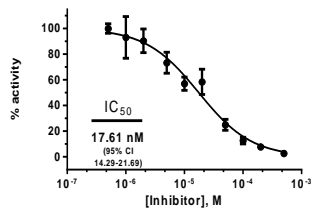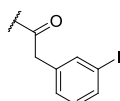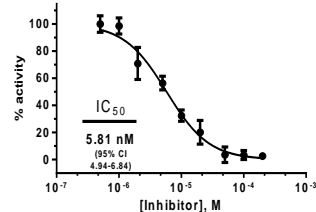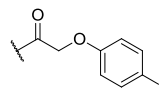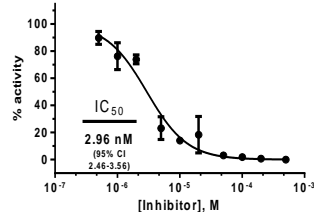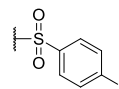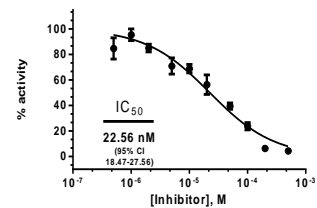

Each experiment was performed in triplicate. Error bars represent the mean  $\pm$  SD.

#### 4. Cellular IC<sub>50</sub> curves for compounds 1 and 5.

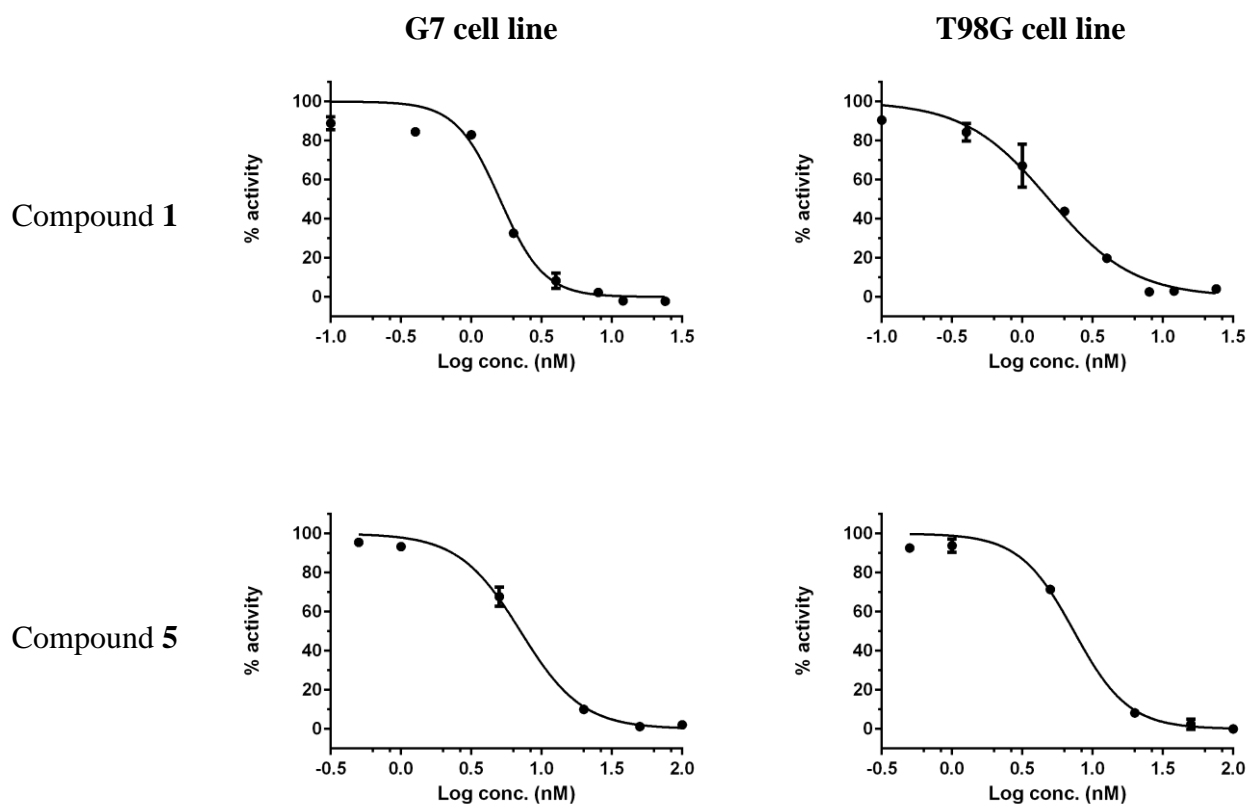

Each experiment was performed in duplicate. Error bars represent the mean  $\pm$  SD.

#### 5. Plasma stability graph for compound 5.

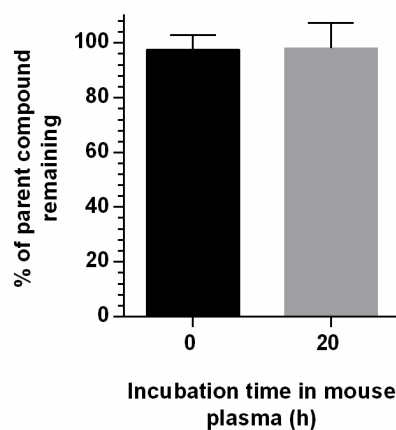

Each experiment was performed in triplicate. Error bars represent the mean  $\pm$  SD.



## 6. Metabolic stability graphs for compounds 1 and 5.

Compound 1

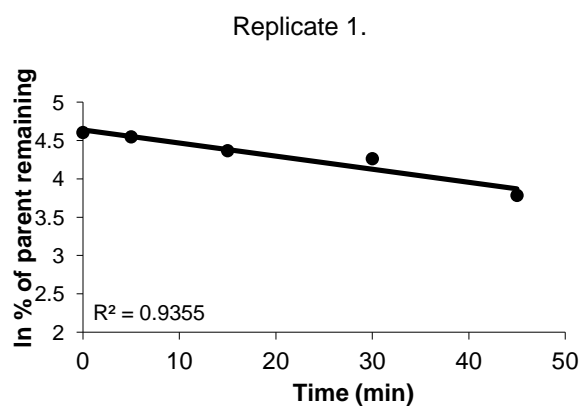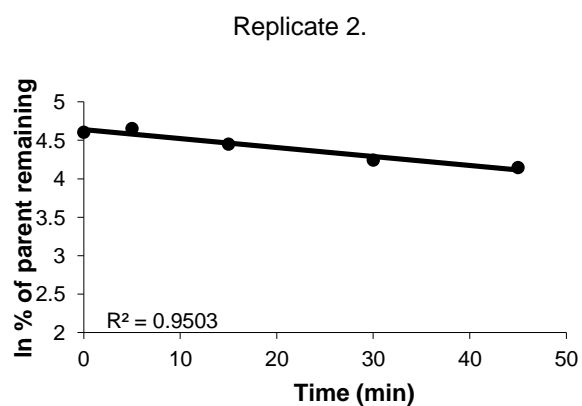

Compound 5

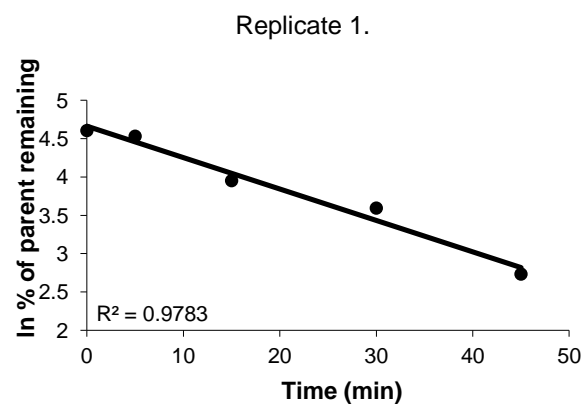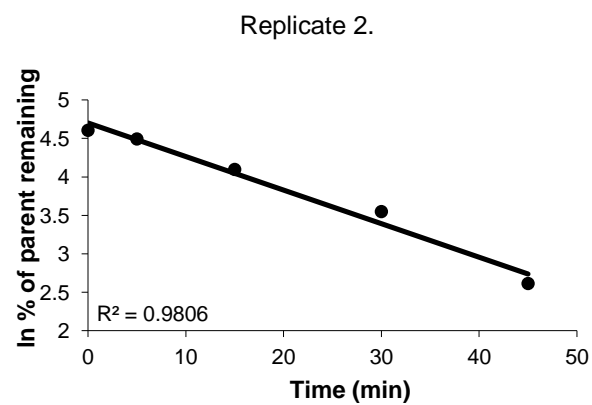

## 7. Radiochemistry HPLC chromatograms

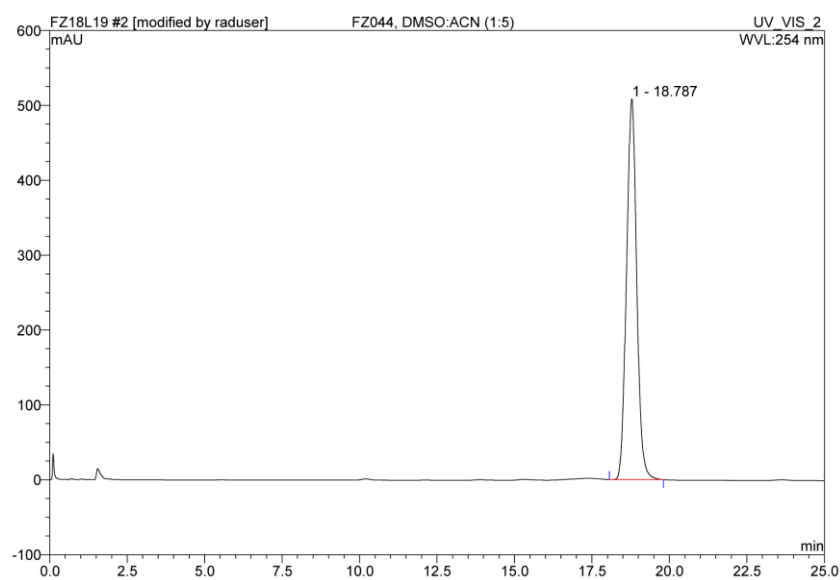

UV (254 nm) HPLC chromatogram of non-radioactive compound 5.

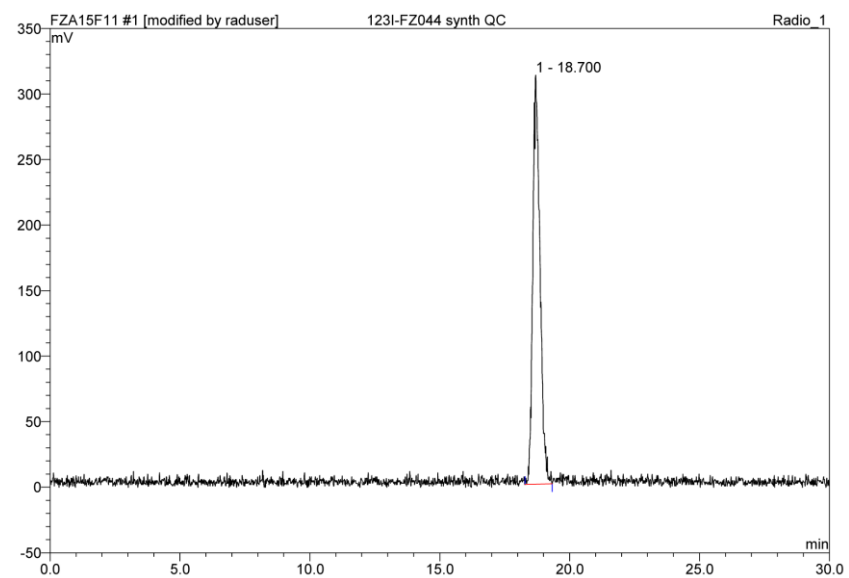

Radio-HPLC chromatogram of [ $^{123}\text{I}$ ]-5.

## 8. References

1. Menear, K. A.; Adcock, C.; Boulter, R.; Cockcroft, X.; Copsey, L.; Cranston, A.; Dillon, K. J.; Drzewiecki, J.; Garman, S.; Gomez, S.; Javaid, H.; Kerrigan, F.; Knights, C.; Lau, A.; Loh, V. M.; Matthews, I. T. W.; Moore, S.; O'Connor, M. J.; Smith, G. C. M.; Martin, N. M. B. 4-[3-(4-cyclopropanecarbonylpiperazine-1-carbonyl)-4-fluorobenzyl]-2*H*-phthalazin-1-one: a novel bioavailable inhibitor of poly(ADP-ribose) polymerase-1. *J. Med. Chem.* **2008**, *51*, 6581–6591.
2. Moussa, I. A.; Banister, S. D.; Beinat, C.; Giboureau, N.; Reynolds, A. J.; Kassiou, M. Design, synthesis and structure-affinity relationships of regioisomeric *N*-benzyl alkyl ether piperazine derivatives as  $\sigma$ -1 receptor ligands. *J. Med. Chem.* **2010**, *53*, 6228–6239.
